# Supplementary material for: Cryomilled Ni-Co-Se Enables Water Oxidation Electrocatalysts Durable at High Current Densities
Source: Research Square preprint supplement (doi:10.21203/rs.3.rs-85446/v1), 2020-12-11
Supplement: Supplementary file 1 [file e0d30a93fa01b24de744893b.docx]

Supplementary Information for

Cryomilled Ni-Co-Se Enables Water Oxidation Electrocatalysts

Durable at High Current Densities

**Contents:**

- Methods
  - Materials
  - Characterization
  - Electrochemical testing
  - X-ray absorption spectroscopy
  - Computational methods
  - AEM electrolyser test
- Supplementary Figure S1 to Figure S11
- Supplementary Table S1 to Table S8
- References (*1-79*)

**Methods**

**Materials**

Chemicals

Table S1. Materials list

| **Material** | | **Company** | **Purity** (%) | **Particle Size** (µm) |
| --- | --- | --- | --- | --- |
| Ni | | Alfa Aesar | 99.9 | 74 - 149 |
| Co | | Alfa Aesar | 99.8 | 44 -149 |
| Se | | Alfa Aesar | 99.5 | < 44 |
| DDPA | | Alfa Aesar | - | - |
| NiCl2.6H2O | Sigma Aldrich | | 99.9 | - |
| FeCl3 (Anhydrous) | Alfa Aesar | | 98 | - |
| Ni NPs | Alfa Aesar | | >99 | <100 |
| IrO2-AA | Alfa Aesar | | 99.99 | - |
| Nafion-D521 | | Ion Power | - | - |

Cryomilling

Cryomilling was conducted in a Retsch Cryomill. The Ni, Co, and Se powders with two stainless steel balls (7 mm diameter), weighing together 2769 mg, were all placed in a 5 mL stainless steel jar to maintain a ball-to-powder ratio (BPR) of 10:1. To prevent undesired oxidation during milling, the jar was sealed in Ar and then placed in a milling container (each container can hold 4 milling jars). Then, the powders were milled at a high linear speed (30 Hz) and forced to blend under the influence of ball-powder-ball high-energy collisions.

Cryomilling was performed in cycles of 30 minutes each. Between cycles, the vails were pre-cooled by flowing liquid nitrogen (LN2) through the container and over the outer surface of the milling jar for 5 minutes to sustain cryogenic temperatures during the entire ball milling process.

Using cryo-milling, Ni-Co-Se alloy compounds were prepared according to quantities and the procedure shown in Table S2.

Table S2. Weight percentage of Ni-Co-Se alloy system

| **Alloy** | **Element (wt.%)** | | |
| --- | --- | --- | --- |
| Ni | Co | Se |
| Ni-Se | 38.5 | - | 61.5 |
| Co-Se | - | 38.5 | 61.5 |
| (NiCo)Se | 21.3 | 21.4 | 57.3 |
| (NiCo)3Se4 | 17.9 | 18 | 64.1 |

Surfactant-assisted ball milling

In the second stage, powder was added to a 5 mL vial with a BBR of 50:1 to conduct SABM. In addition, 70.2 μL of anhydrous ethanol (1:1 ethanol-to-powder mass ratio) and 11.1 mg of dodecylphosphonic acid (DPPA) as surfactant (1:4 DPPA-to-powder mass ratio) were added to the milling vial to produce nanoparticles (< 100nm) suspension. SABM was carried out for 10 hours in total (5 cycles of 30 mins and 80 mins of off time between cycles) for all alloys in this study. This procedure was followed based on the optimization of parameters conducted in our previous work.1 To extract nanoparticles from the suspension, the surfactant must be removed after milling. First, ethanol was added to milling vials and the powder-ethanol slurry mixture was extracted by pipetting into centrifuging tubes until the vials were empty. Then, the tubes were sonicated for 30 min before centrifuging at 3000 rpm for 30 mins, the large particles settled at the bottom of the tube. The suspended nanoparticles in solution were extracted by pipetting into new centrifuging tubes. The tubes were sonicated for 30 mins before centrifuging at 10,000 rpm (11,000 rcf) for 1 h and then the clear solution was washed and replaced with fresh ethanol, this procedure was repeated at least 3 times until all nanoparticles in the solution precipitate at the bottom of the tube. The tubes were then filled with ethanol and the nanoparticles-ethanol mixture was transferred to 20 mL scintillation vials. Scintillation vials were then heated at 65°C in a furnace under air flow until all ethanol evaporates. The dry nanoparticle powder was then collected from the vials and stored.

Ni-Se and Co-Se baseline samples

The structural evolution for Ni-Se and Co-Se samples was probed with respect to milling time using XRD (**Figures S1 and S2**). A high melting point intermetallic composition was identified from Ni-Se and Co-Se phase diagrams for synthesis: 46 at. % Ni/Co and 54 at. % Se (**Figures S1b and S2b**). We observed a complete mixing of Ni and Se into a single nanocrystalline phase with an average size of 2 nm after 15 hours of milling. Furthermore, Co-Se formed an alloy only after 9 hours of milling and has undergone polymorphic phase transformations during the 15 hours of milling (**Figure S2a**). This transformation over a range of metastable phases was observed, in previous reports, to occur repeatedly on continued ball milling for alloys that have either Co, Se, or Ti 2–4. The free energy of the actual metastable phase is determined by the interplay between two competing milling mechanisms: on one hand, accumulation of defects which raises the free energy of the system, on the other hand activation of a phase transformation which lowers the free energy of the system.

Using dynamic light scattering (DLS), the size of the particles was determined to be 60 nm for NiSe and 90 nm for CoSe (**Figures S1d and S2d**). It is worth noting that these particle sizes are at least two orders of magnitude smaller than the size of particles usually produced by cryomilling without the use of surfactant (without SABM step).5. This implies that despite the possibility of particles welding together due to excessive collisions, Se played an important role in stabilizing single phase nanoparticles (<100nm) with Ni and Co.

Sol-Gel Synthesis

NiFe oxyhydroxides were synthesized using a modified aqueous sol-gel technique 6. Anhydrous NiCl2.6H2O (2.0 mmol) and FeCl3 anhydrous (0.7 mmol) were first dissolved in ethanol (4 mL) in a vial. Deionized water (DI) (0.21 mL) was mixed with ethanol (2 mL) in a separate vial. All above solutions were cooled in an ice bath for 2 h. The Ni and Fe precursors were then mixed with an ethanol-water mixture to form a clear solution. To this solution, propylene oxide (≈1 mL) was then slowly added, forming a dark gel. The NiFe wet-gel was aged for 1 day to promote network formation, immersed in acetone, which was replaced periodically for 5 days before the gel was dried in vacuum oven.

**Characterization**

XRD

The crystal structure of catalysts was determined using X-ray Diffraction (XRD). A Miniflex 600 (Rigaku, Japan) equipped with D/tex Ultra silicon trip detector and Cu Kα radiation (λ = 1.5418 Å) was used. Powders were prepared by mixing with acetone and then dropping a small drop of the mixture to fill a 4 mm diameter x 100 μm deep groove in a single crystal silicon holder (zero-background). The angle was varied between 20° to 80° with a step size of 0.05° every 2 seconds.

Using Scherrer’s equation:

D is the mean crystallite size which can be equal to or less than the particle size, λ is 0.154 nm for Cu X-ray source, K is shape factor has a typical value between 0.9-1.

The analysis was carried on (NiCo)Se because, unlik2e (NiCo)3Se4, it has fewer overlapping peaks in its XRD pattern, which can complicate the analysis. Also, the analysis was carried out on planes in the 2θ range of 30 – 50 to avoid broadening caused by the instrumentation at higher 2θ values.

| Plane | d-spacing (nm) | 2θ | FWHM (rad) | D (nm) |
| --- | --- | --- | --- | --- |
| (101) | 2.711 | 33.01 | 0.084 | 1.92 |
| (102) | 2.032 | 44.55 | 0.0910 | 1.83 |
| (110) | 1.820 | 50.08 | 0.099 | 1.71 |

DLS

The particle size distribution of catalysts was analyzed using Dynamic Light Scattering (DLS). A LB-500 particle size analyzer (Horiba, Japan) was used. Samples were prepared by dispersing a small amount of the powder in ethanol. The solution mixture was then loaded into disposable plastic 4 mL cuvettes (VWR, U.S.). A 5-mW laser source with a wavelength of 650 nm is directed to the sample in the cuvette to enable the measurement of particles ranging from 3 nm to 6 μm.

Electron Microscopy

The structural characterization and elemental mapping of the catalysts were done using Scanning Electron Microscopy (SEM) and Transmission Electron Microscope (TEM). TEM experiments were performed in a Hitachi HF3300 equipped with a cold field emission electron gun using an accelerating voltage of 300 kV. TEM bright field images were used to determine the size and the shape of nanoparticles. Energy X-ray dispersive spectroscopy (EDS) detector was used in scanning transmission electron microscopy (STEM) mode to analyze and quantify the composition of the nanoparticles. Also, secondary electron (SE) detector was used to collect high resolution images of the morphology of the nanoparticles in the TEM. Powder samples were prepared in ethanol to form an ink, the ink was sonicated for 10 minutes before drop casting a 1 -2 µL drop on a 400-mesh copper grid and drying overnight.

The particle and geometry of larger particles were investigated using Scanning Electron Microscopy (SEM). Imaging was conducted using Hitachin SU3500. The composition of particles was determined using an attached EDS detector. Powder samples were prepared by adhering to carbon tape on a SEM aluminum stub. Compressed air is blown over the stub to loosen excess powder. In some cases, thin carbon or gold coating might be needed for poor conducting samples.

**Electrochemical testing**

For all electrochemical experiments in this work, a BioLogic VSP-300 multi potentiosat was used. All tests were performed in 1 M Fe-free KOH electrolyte at 30 °C. The electrolyte was pre-electrolyzed using a two-electrode set-up Pt working and counter electrodes at -1.7 V for 48 hours prior using to remove any trace metal impurities in the solution specifically Fe. The cell is placed in a water bath to control the temperature and the electrolyte is purged with Ar for an hour before the test to remove O2.

Three-electrode test

To assess the activity of the electrocatalysts, we constructed a three-electrode custom-made Teflon cell to avoid contamination from glassware etching and used 1M Fe-free KOH to rule out the contribution of Fe ions in the electrolyte on the activity and stability of the electrocatalysts.7 Hg/HgO was used as a reference electrode and Pt mesh was used as the counter electrode. The electrocatalysts were deposited on a 3mm glassy carbon electrode (GCE) and tested using the protocol detailed in Table S4. A continuous Ar bubbling was used during the test to reduce O2 saturation in the electrochemical cell and improve bubble release from the surface of the electrocatalyst which can significantly influence the performance.8

Sample preparation for electrocatalyst on glassy carbon

Powder samples were prepared by making inks. The inks were produced by mixing 4 mg of the catalyst with 80 μL of Nafion® D521 (IonPower) and 1.25 mL of water-to-ethanol (4:1) solution. The mixture was sonicated for 30 minutes before drop casting a 5 μL of the ink on a 3 mm diameter glassy carbon (GC) electrode to produce a thin catalyst layer with a loading of 0.21 mg.cm-2. The electrode is polished using 0.08 μm colloidal silica every time before applying inks. To load the catalyst on Ni foam (thickness: 1.7 mm, INCO), several drops of the ink are added to achieve a catalyst loading of 2 mg.cm-2 on 0.5 cm x 0.5 cm piece.

Sample preparation for electrocatalyst on carbon paper

The electrocatalyst were prepared in inks by mixing with a solution of 4:1 water to ethanol and Nafion binder. The ink was then deposited on one side of a 0.5 cm x 0.5 cm untreated carbon paper and left to dry in air.

Sample preparation for electrocatalyst on nickel foam

The electrocatalyst were prepared in inks by mixing with a solution of 4:1 water to ethanol and Nafion binder. The ink was deposited by drop-casting on one side of a 0.5 cm x 0.5 cm nickel foam piece with a mass loading of 2 mg.cm-2.

Activity and Stability protocols

A protocol to test the activity and stability of electrocatalysts used for OER was established as shown in Table S3. First, the open cell potential (OCP) was recorded for 30 mins to stabilize the material in the solution. The resistance of the solution was measured by electrochemical impedance spectroscopy (EIS). The frequency was scanned from 1 MHz to 1 kHz with an amplitude of 1 mV. Once EIS is completed, cyclic voltammetry (CV) is performed to clean and activate the surface. Each CV measurement was repeated 3 times at a speed of 50 mV.s-1 to produce a unique fingerprint of anodic and cathodic peaks in the range from 0-1.6 V vs RHE. This was followed by measuring the electrochemical surface area (ECSA) in a non-Faradaic region using various scanning speeds as explained in the Table S3. Each CV measurement at a specific speed is repeated 3 times. To measure the activity, polarization curves were acquired to conduct Tafel analysis and determine the catalytic properties of OER. This was performed using a Linear Sweep Voltammetry (LSV) with a slow speed 1 mV.s-1 to allow the surface to stabilize and reflect the true reaction mechanism. In the last step, the stability can be assessed using chronopotentiometry. A fixed current density will be applied to evaluate the stability of the catalyst on different substrates. Electrode potentials were measured with respect to Hg/HgO reference electrode. The Hg/HgO reference electrode was experimentally calibrated in a two-electrode setup using three different standard calomel electrodes (SCE) yielding in E(Hg/HgO) = E(SCE) + 144 mV. The potentials were converted to the RHE using E(RHE) = E(SCE) + 0.241V+0.059*pH.

iR correction

We used electrochemical impedance spectroscopy (EIS) to determine uncompensated resistance (Rs). At all potentials tested on GCE, the potential was corrected using Ohm's law:

Ecorrected =Eapplied – iR

Eapplied is applied potential, i is the current measured, and compensating for 100% of the resistance.

Intrinsic Activity

Electrochemical Surface Area (ECSA) measurements were conducted to determine the intrinsic activity of the catalysts. The roughness factor (RF), which is equal to ECSA/geometric area, was calculated. While cycling at different scanning speeds, the double layer capacitance (Cdl) can be calculated from the slope of the current (average difference between anodic and cathodic values for each cycle) vs scanning speed. ECSA is calculated by dividing Cdl over a specific capacitance value (Cs) that can range between 0.02-0.13 mF.cm-2 9. In this work we used 0.04 mF.cm-2 for all Ni and Co based alloys 10**.**

Table S3. A protocol to assess the electrocatalysts used for oxygen evolution reaction (OER)

| **#** | **Process** | **Method** | **Parameters** |
| --- | --- | --- | --- |
| **1** | **Solution Resistance** | Electrochemical Impedance Spectroscopy | - 1 MHz – 1 kHz - Amplitude 1 mV |
| **2** | **Activation/Catalyst Fingerprint** | Cyclic Voltammetry | - Cycles = 3 - Potential = 0-1.6 V vs RHE - Speed = 50 mV.s-1 |
| **3** | **ECSA** | Cyclic Voltammetry | - Potential = 0.95-1 V vs RHE - Speed = 20, 40, 60, 80, 100 mV.s-1 - Cycles = 3 |
| **4** | **Activity and Mechanism** | Linear Sweep Voltammetry | - Potential = 0-1.6 V vs RHE - Speed = 1 mV.s-1 |
| **5** | **Stability** | Chronopotentiometry | - Current = 10, 100, 500, 1000 mA.cm-2 |

Alternating Stability Test

A special electrochemical protocol was designed to test the stability of the (NiCo)3Se4 in Fe-free 1M KOH. The sample was polarized at constant current density 10 mA.cm-2geo for 10 hours. Then, open circuit potential (OCP) for 1 h, linear sweep voltammetry (LSV) and cyclic voltammetry were carried out to evaluate the change in performance with time. This was repeated 35 times to evaluate the stability for 35 hours of operation.

Turnover Frequency Calculations

j is the measured current density (mA.cm2), S is the geometric surface area of the electrode, and n is the moles of the active atoms in the loaded catalyst. Also, assuming that all metallic sites are active (lower limit of TOF).

| **Catalyst** | **jgeo @ 300 mV**  mA.cm-2 | **jECSA @ 300 mV**  mA.cm-2 | **RF** | **TOF** 10-3 s-1 per site |
| --- | --- | --- | --- | --- |
| (NiCo)3Se4 | 25.04 | 3.08 | 8.13 | 50.76 |
| (NiCo)Se | 16.64 | 2.19 | 7.60 | 28.09 |
| IrO2 | 9.94 | 0.74 | 13.43 | 27.49 |
| NiFe Sol-Gel | 19.25 | 0.07 | 275 | 23.98 |
| Ni | 0.70 | 0.04 | 17.55 | 0.51 |

**X-ray absorption spectroscopy**

sXAS

*Ex-situ* sXAS measurements were performed at the Spherical Grating Monochromator (SGM) beamline of the Canadian Light Source. All samples were scanned from in 0.1 eV steps for the. Surface sensitive absorption spectra were recorded using total electron yield (TEY) and partial fluorescence yield (PFY) simultaneously.

In situ XAS

*In situ* X-ray absorption spectroscopy (XAS)measurements for the K-edge of Ni and Co were carried out at 9-BM using quick XAS (30 secs per spectrum), while Se was measured at 20BM in the advanced photon source (APS, IL, USA). An in-house custom-made electrochemical cell with a typical three-electrode configuration was used to track XAS changes *in situ*. A platinum mesh and Ag/AgCl electrode were used as counter electrode and reference electrode, respectively. The catalyst was prepared on one side of a carbon paper while the other side was stuck to a thin Kapton tape (polyimide film with silicone adhesive) and connected electrically by Cu tape. Then, the sample was mounted on the window of the electrochemical cell so that the back side of the sample is facing the beam and the catalyst (front side) is in direct contact with the electrolyte. All measurements were done in air and under ambient conditions. *In situ* experiments were conducted at 4 conditions: Dry, OCP, 1.1V (Before OER) and 1.5V (during OER) in 1M KOH. Data was collected in fluorescence mode using a Passivated Implanted Planar Silicon (PIPS)/Lytle detector placed at 45° degrees. Several spectra were collected and averaged at each condition to improve the quality of the data and increase the signal to noise ratio. Data post-processing and fitting was done entirely using Demeter software package11.

**Computational methods**

The (001) and (101) NiSe surfaces of the pure material (Ni-Se), containing a Se vacancy (Ni-Sevac), Co-doping (Ni-Co-Se), and a combination of a Se vacancy and Co-doping (Ni-Co-Sevac), were selected for calculations (**Figures S12, S13, and S14**). These systems are consistent with the experimental results. We considered OER species on Ni and Co sites because of the experimental 50% Co doping, therefore only 50% of the Ni atoms in the top layer were substituted with Co. The (001) and (101) surfaces have 3×3 and 3×2 supercell dimensions with a 15 Å vacuum layer to prevent the slabs from interacting with each other. The surfaces have five layers and bottom three layers were fixed to mimic bulk conditions. The Perdew, Burke, and Ernzerhof (PBE)12 exchange-correlation functional with a dispersion interaction correction (PBE+D)13,14 was used together with a plane-wave basis set and projector augmented wave pseudopotentials.15 A kinetic cut-off energy of 45 Ry and a Monkhorst–Pack scheme k-point mesh of 2×2×1 were used in all calculations. The convergence criteria for the self-consistency and ionic forces were set to 1.0 × 10-6 Ry and 0.001 Ry/Bohr, respectively. All calculations were performed within Quantum Espresso package (Version 6.2.1).16

The OER mechanism and adsorption energy for Ni-Se, Ni-Sevac, Ni-Co-Se, and Ni-Co-Sevac surfaces are shown below where the M indicates the NiSe surface

Step 1: MNi-Se/Ni-Sevac/Ni-Co-Se/Ni-Co-Sevac+H2O → MH2O

∆E = MH2O – MNi-Se/Ni-Sevac/Ni-Co-Se/Ni-Co-Sevac– H2O

Step 2: MH2O → MOH + (e-+H+)

∆E = MOH + 1/2H2 – MH2O

Step 3: MOH → MO + (e-+H+)

∆E = MO + 1/2H2 – MOH

Step 4: MO + H2O → MOOH + (e-+H+)

∆E = MOOH + 1/2H2 – MO – H2O

Step 5: MOOH → MOO + (e-+H+)

∆E = MOO + 1/2H2 – MOOH

Step 6: MOO → MNi-Se/Ni-Sevac/Ni-Co-Se/Ni-Co-Sevac+ O2

∆E = MNi-Se/Ni-Sevac/Ni-Co-Se/Ni-Co-Sevac+ O2 – MOO

**AEM electrolyser test**

The anode electrode was prepared by spraying (NiCo)3Se4 and IrO2 inks on 300 µm Nickel foam (Kunhewuhua™), spraying was controlled to achieve a mass loading of 2 mg.cm-2. The Nickel foam was degreased and pretreated in HCl before using to remove the passive oxide layer and other contaminants. For hydrogen evolution, 40% Pt/C was sprayed on untreated carbon paper (AvCarb 190, Fuel Cell Store) with a loading of 1 mg.cm-2, while for CO2 reduction the Cu electrode on PTFE was prepared following the exact procedure proposed by Gabardo et al. 17. The catalysts were prepared in isopropanol and 5 wt.% Nafion binder before spraying. An anion exchange membrane (Sustanion® x37-50) was used to separate the cathode and anode compartments of the electrolyser, each end plate with a 5 cm2serpentine flow field. For water splitting, 1 M KOH was fed to both sides of the electrolyser, while for CO2 reduction only the anode was supplied with 1 M KOH while the cathode was provided with humidified CO2.

**
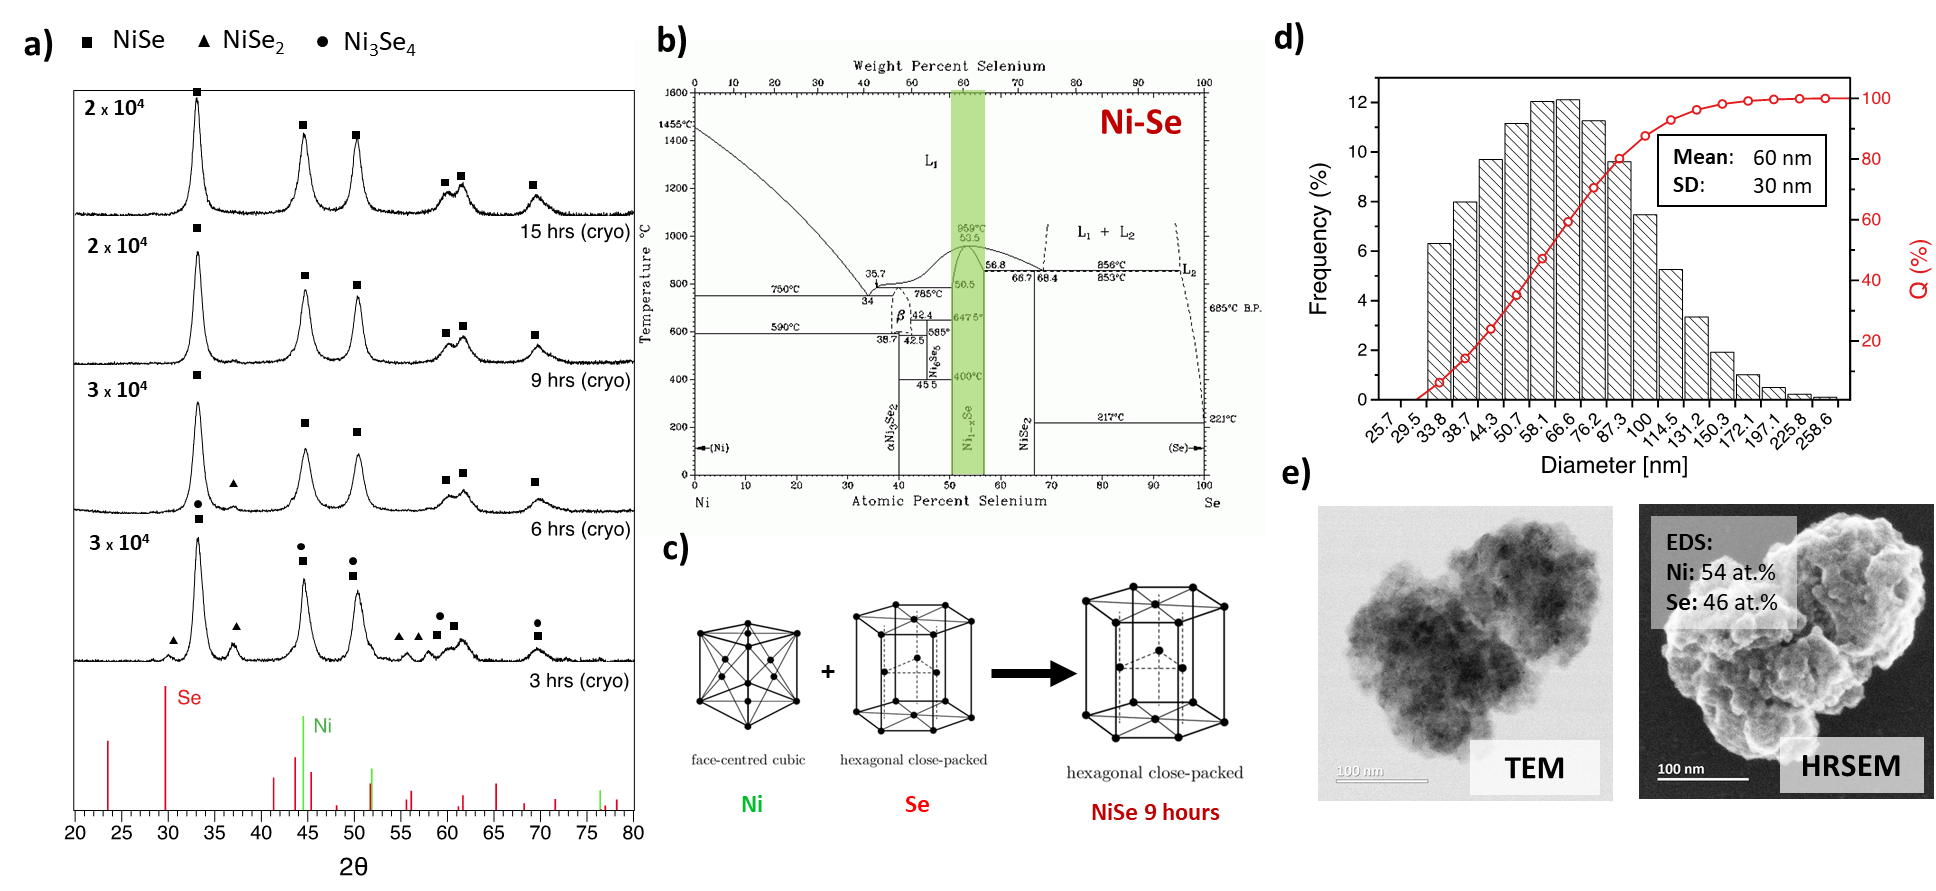
**

Figure S1. Characterization of Ni-Se compound. a) XRD evolution with cryomilling time b) Ni-Se phase diagram c) crystal evolution d) DLS particle distribution and e) TEM and HRSEM images for NiSe cluster after 9 hours of cryomilling.


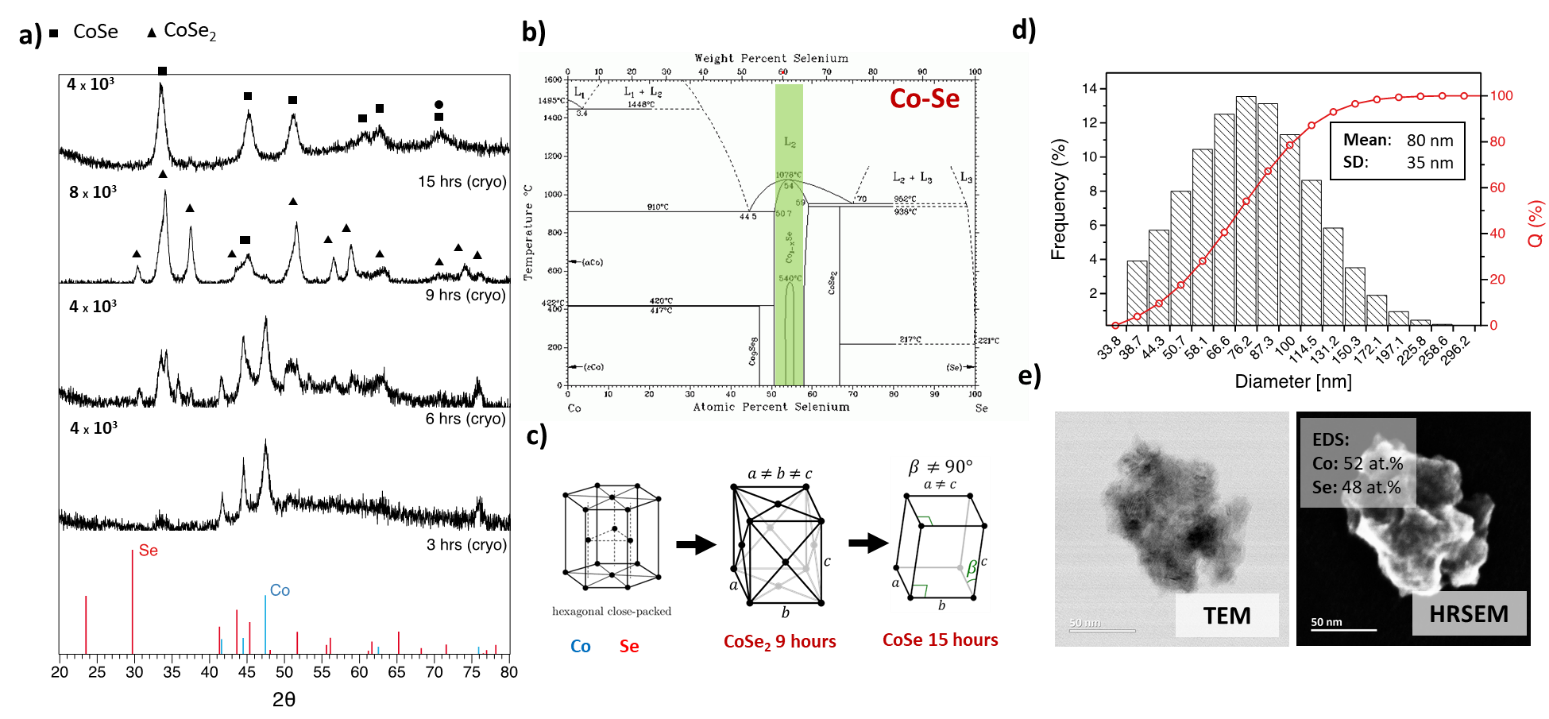


Figure S2. Characterization of Co-Se compound. a) XRD evolution with cryomilling time b) Ni-Se phase diagram c) crystal evolution. d) DLS particle distribution and e) TEM and HRSEM images for Co-Se cluster after 15 hours of cryomilling

**
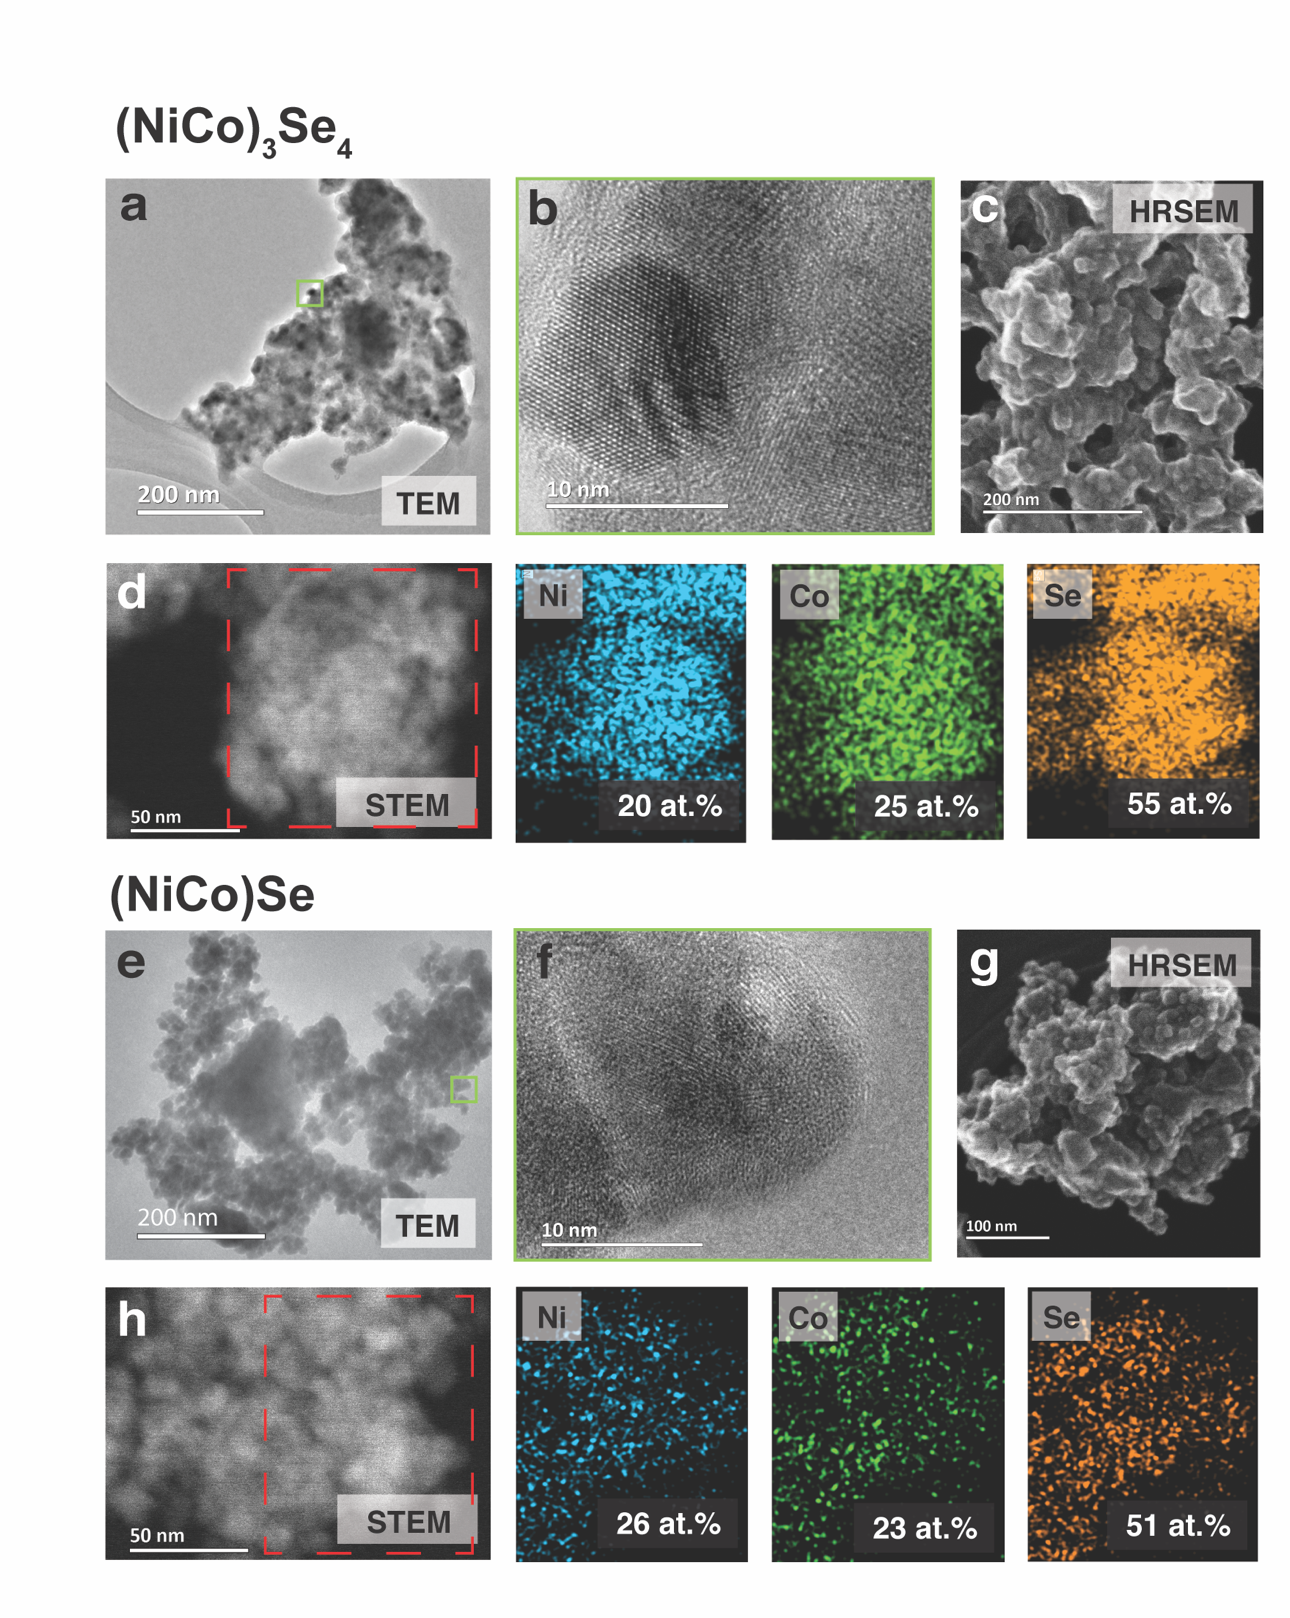
**

Figure S3. Structural and compositional analysis of (NiCo)3Se4. a) TEM image of the nanoparticle cluster. b) HRTEM image of a single particle in the cluster. c) HRSEM image of the nanoparticle cluster. d) HAADF-STEM image with corresponding EDS elemental mapping for Ni, Co and Se. Structural and compositional analysis of (NiCo)Se. e) TEM image of the nanoparticle cluster. f) HRTEM image of a single particle in the cluster. g) HRSEM image of the nanoparticle cluster. h) HAADF-STEM image with corresponding EDS elemental mapping for Ni, Co and Se.


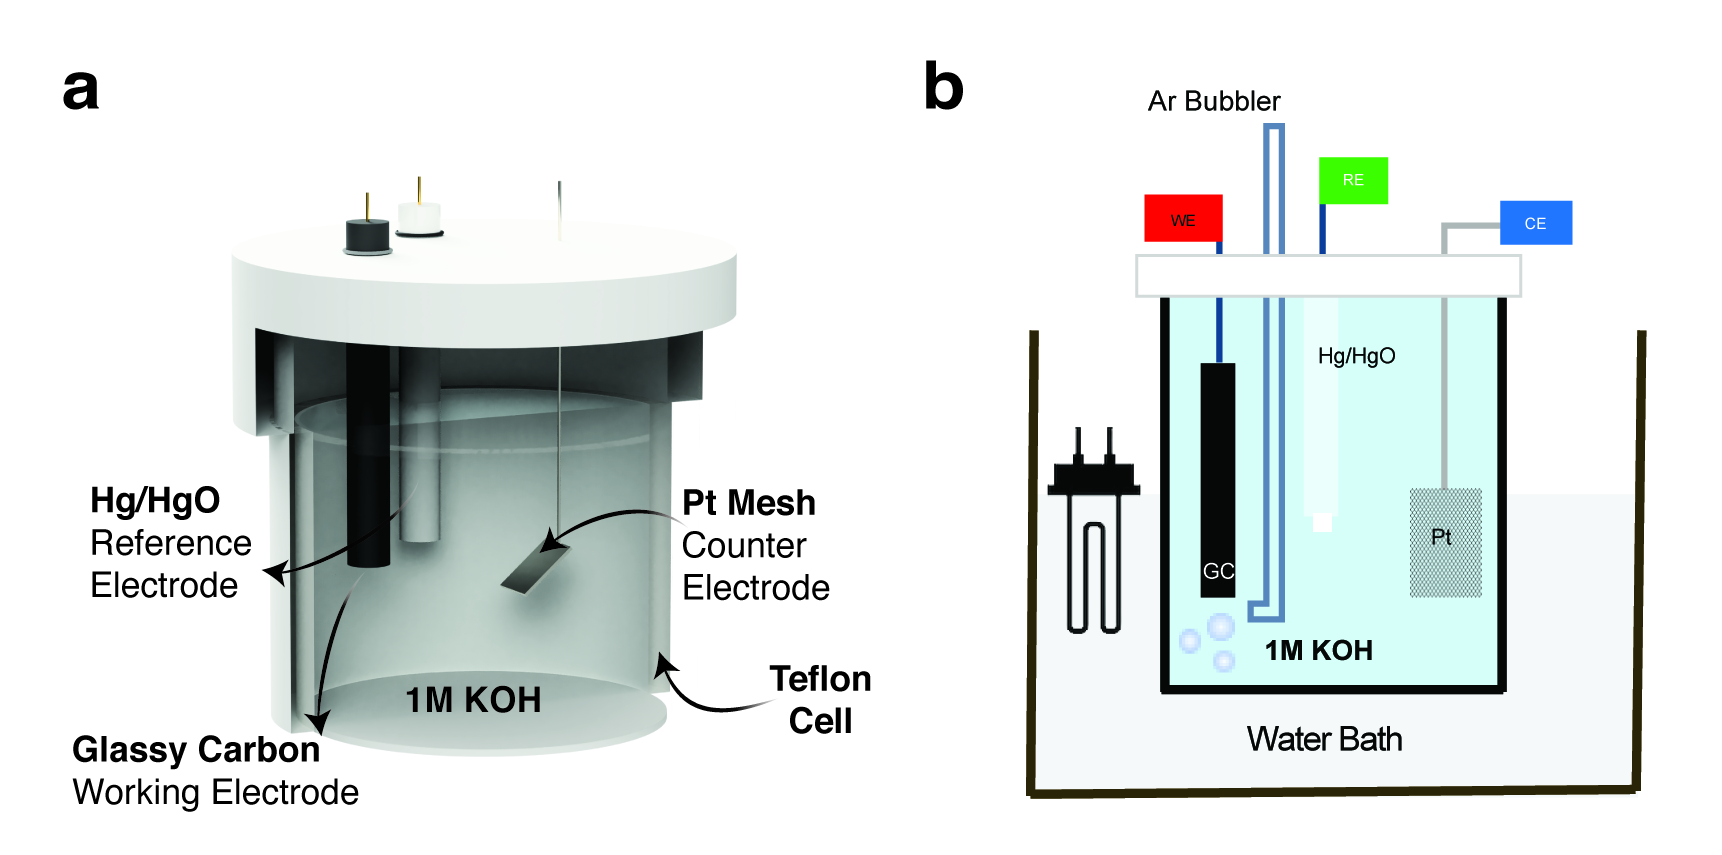


Figure S4. a) illustration of the actual cell used for electrochemical testing b) cross sectional schematic of the cell in water bath and with Argon bubbler.

Figure S5. Polarization curves of (NiCo)3Se4  and (NiCo)Se after Cryomilling (Cryo) and after surfactant assisted ball milling (SABM) compared to standard catalysts Ni, IrO2 and NiFe.


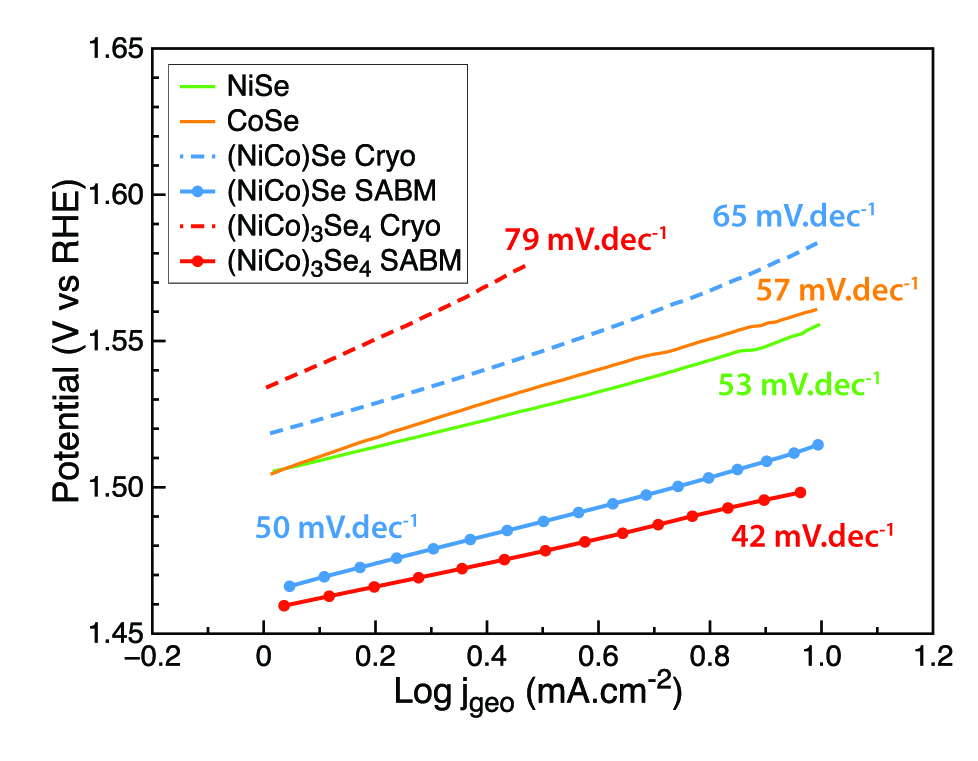


Figure S6. Tafel analysis of (NiCo)3Se4  and (NiCo)Se after Cryomilling (Cryo) and after surfactant assisted ball milling (SABM) compared to NiSe and CoSe.

Figure S7. Cyclic voltammetry done on (NiCo)3Se4 to calculate double layer capacitance (Cdl) for electrochemical surface area (ECSA) calculations

Figure S8. Capacitive current vs scan rate for (NiCo)3Se4, (NiCo)Se, Ni NPs, IrO2, and NiFe.

Figure S9. Chronopotentiometry of activated (NiCo)3Se4 on carbon paper (CP)

Figure S10. Polarization curve of (NiCo)3Se4, on NF and bare NF.


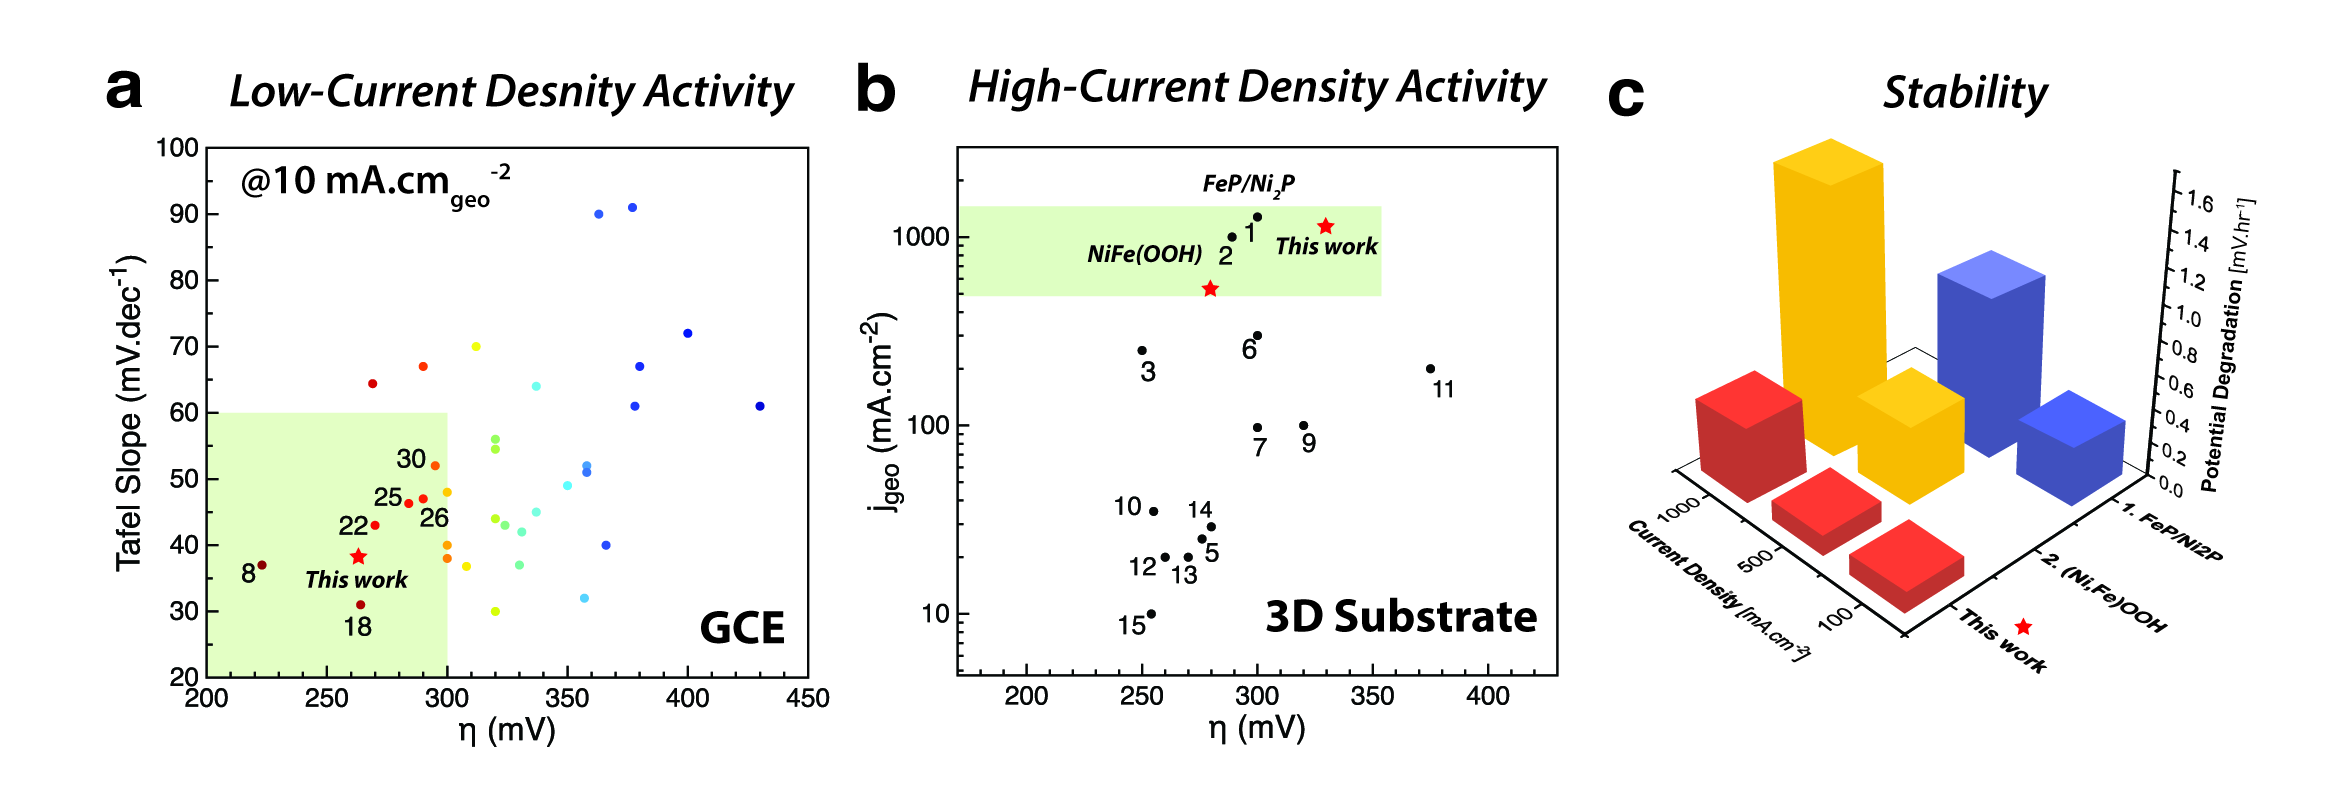


Figure S11. Comparison of the performance of this work (star) and other OER catalysts in literature from Table S8 on b) glassy carbon electrode (GCE) and c) 3D substrates. d) Top performing OER electrocatalysts at a current density >500 mA.cm-2 are compared with respect to electrochemical potential degradation.

Table S4. Summary of electrochemical performance of all catalysts in this study. * overpotential was extrapolated using Tafel slope.

|  | **η** [mV] **@1mA** | **η** [mV] **@10mA** | **Tafel** [mV.dec-1] | **RF** | **Size**  [nm] |
| --- | --- | --- | --- | --- | --- |
| **Ni NPs** | 321±2 | 383±3 | 62 | 17.55 | <100 |
| **IrO2** | 250±1 | 298±1 | 48 | 13.43 | <100 |
| **NiFe** | 212±3 | 272±5 | 62 | 275 | - |
| **NiSe** | 277±1 | 330±5 | 53 | - | 60±30 |
| **CoSe** | 275±1 | 332±1 | 57 | - | 80±35 |
| **(NiCo)Se Cryo** | 288±2 | 353±3 | 65 | - | 1065±330 |
| **(NiCo)3Se4 Cryo** | 310±3 | 389* | 79 | - | 4055±778 |
| **(NiCo)Se SABM** | 233±2 | 283±1 | 50 | 7.60 | 37±15 |
| **(NiCo)3Se4 SABM** | 226±2 | 268±2 | 42 | 8.13 | 67±27 |

**
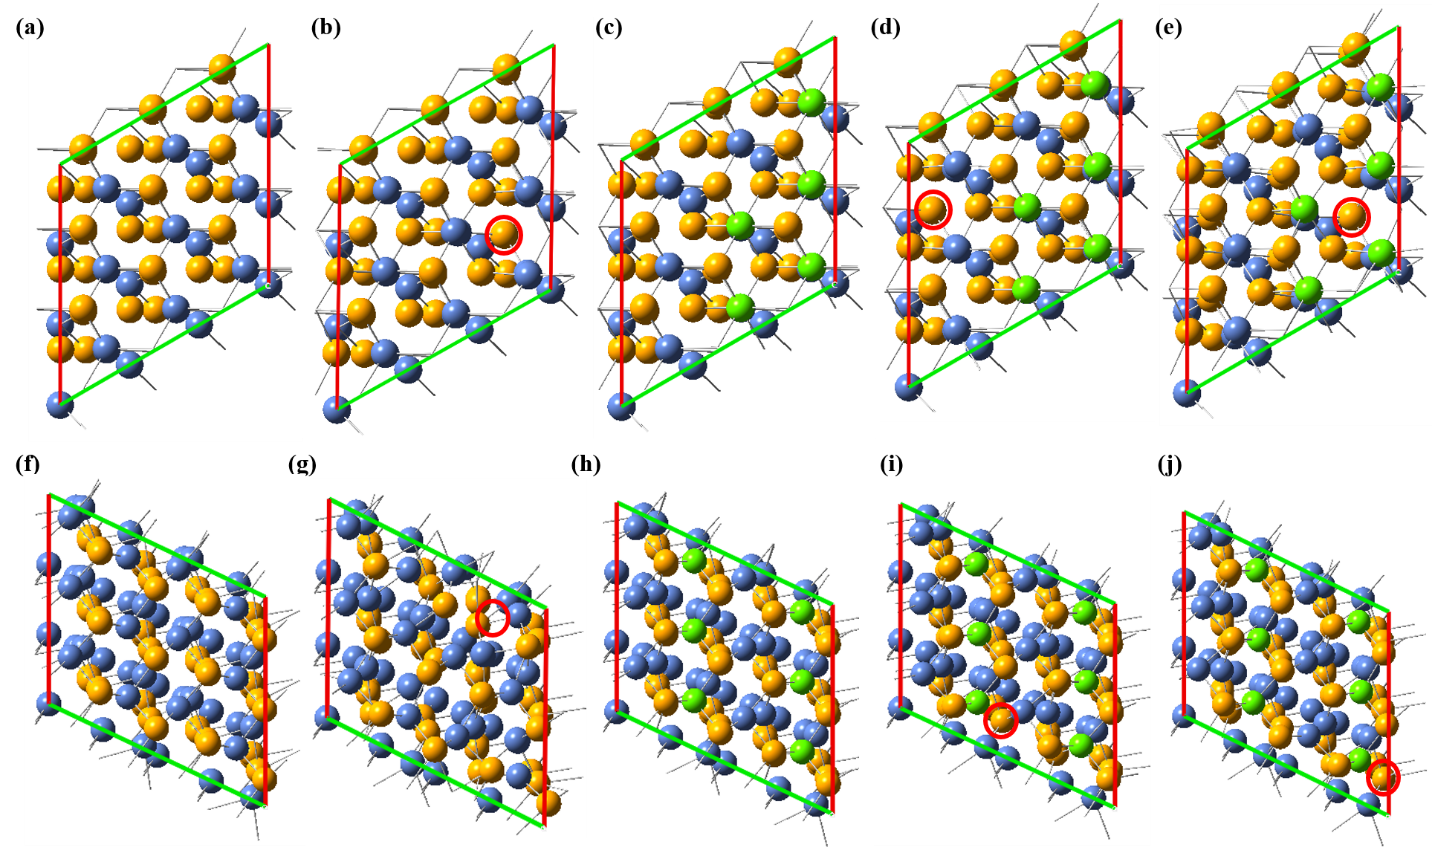
**

**Figure S12.** Ni-Se, Ni-Sevac, Ni-Co-Se, and Ni-Co-Sevac with species reacting at Ni site and Co site on (a, b, c, d, and e) NiSe (001) and (f, g, h, i, and j) NiSe (101) surfaces. Nickel, selenium, and cobalt atoms are given in blue, yellow, and green, respectively. A red circle in b, d, e, g, i, and j show, which Se was removed to form the vacancy.

**
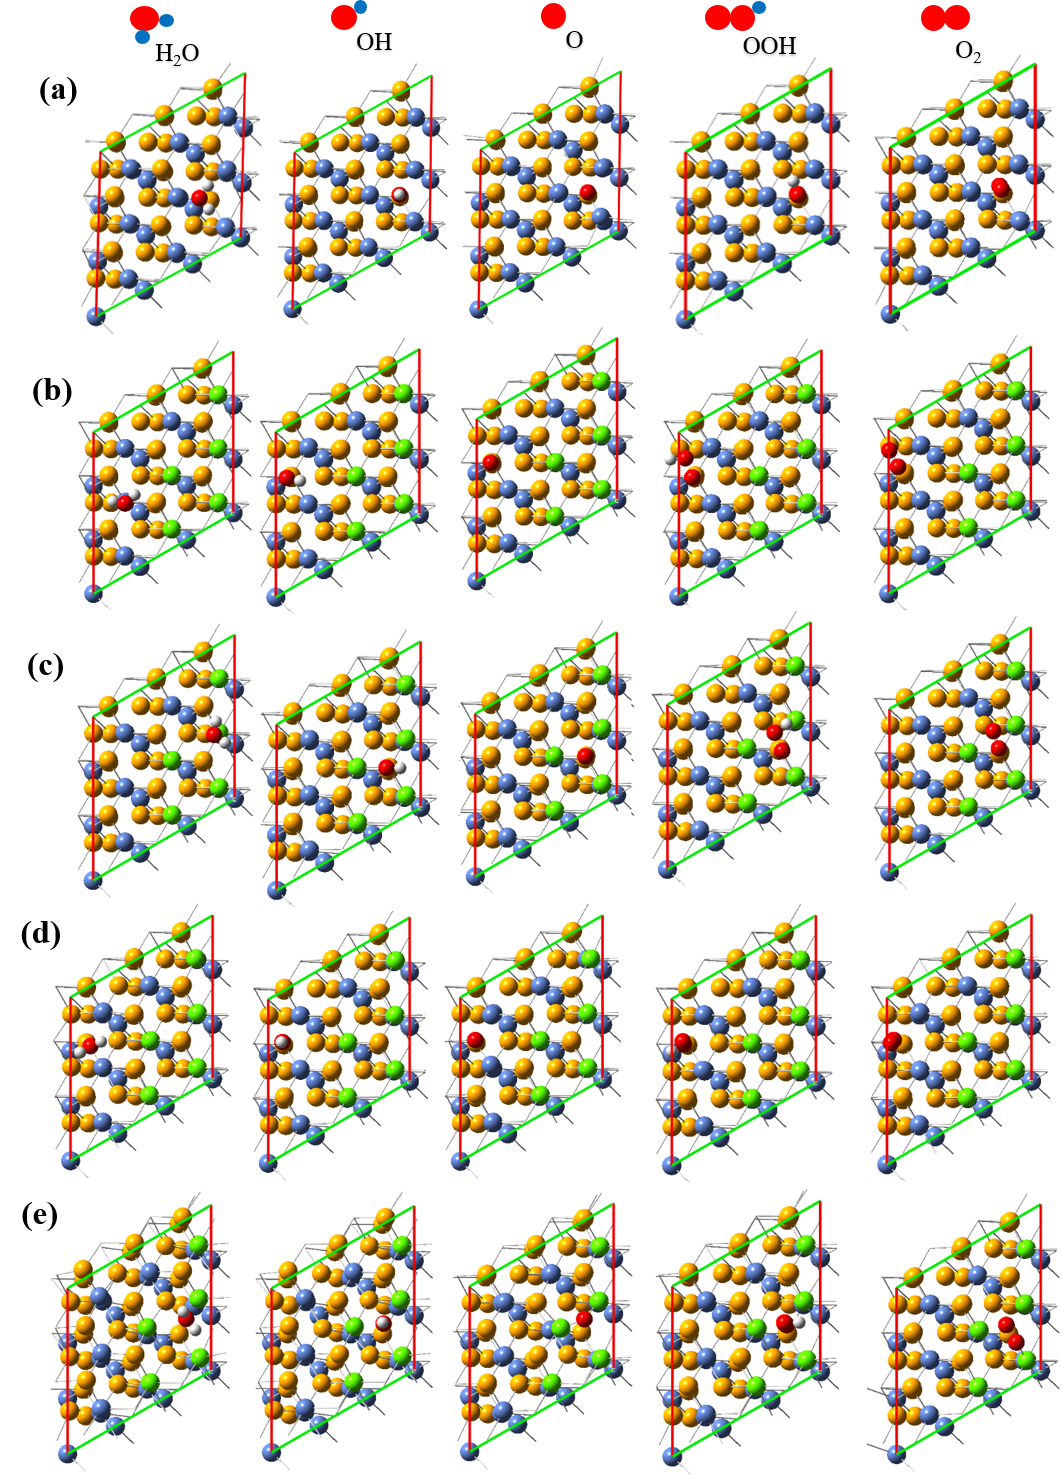
**

**

**

**Figure S13.** Intermediates OER mechanism (a) for Ni-Sevac, Ni-Co-Se with species reacting at (b) Ni site and (c) Co site, and Ni-Co-Sevac with (d) Ni site and (e) Co site on NiSe (001) surface. (f) Reaction potential energies for Ni-Se, Ni-Sevac, Ni-Co-Se, and Ni-Co-Sevac. Nickel, selenium, cobalt, oxygen, and hydrogen atoms are given in blue, yellow, green, red, and white, respectively.

**
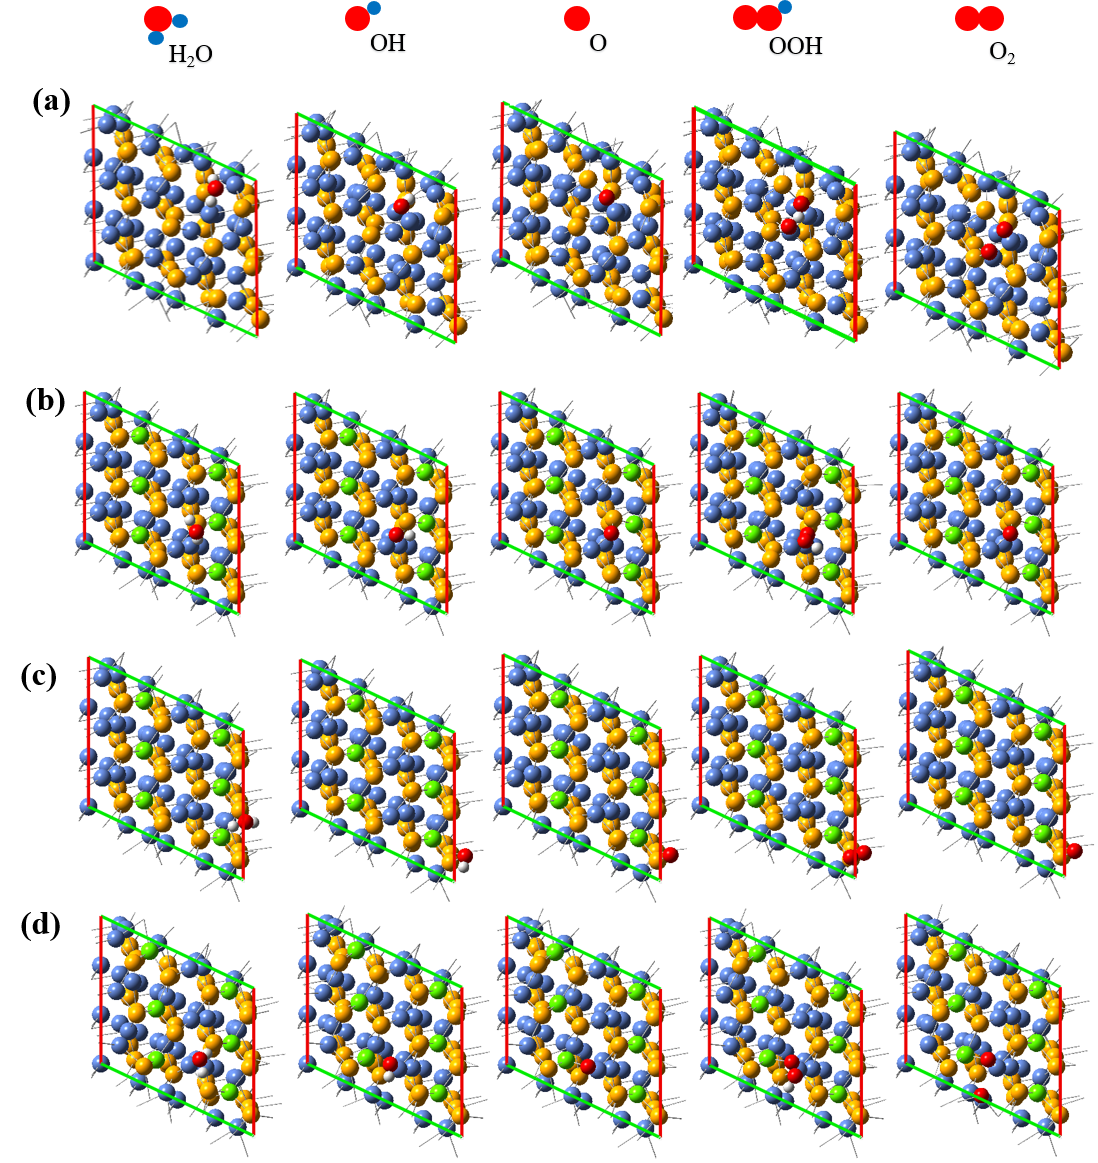
**

**

Figure S14.** Intermediates OER mechanism (a) for Ni-Sevac, Ni-Co-Se with species reacting at (b) Ni site and (c) Co site, and (d) Ni-Co-Sevac on NiSe (101) surface. (f) Potential energy of reaction for Ni-Se, Ni-Sevac, Ni-Co-Se, and Ni-Co-Sevac. Nickel, selenium, cobalt, oxygen, and hydrogen atoms are given in blue, yellow, green, red, and white, respectively.

**Table S5.** Interatomic distance of Ni-O (Å) for OER mechanism intermediates for Ni-Se, Ni-Sevac, Ni-Co-Se, and Ni-Co-Sevac surfaces with species reacting at Ni and Co sites.

|  |  | Interatomic distance (Å) | | | |  |  |
| --- | --- | --- | --- | --- | --- | --- | --- |
| Structure |  | Ni-O  Ni-Se | Ni-O  Ni-Sevac | Ni-O  Ni-Co-Se (Ni Site) | Ni-O  Ni-Co-Se (Co Site) | Ni-O  Ni-Co-Sevac  (Ni Site) | Ni-O  Ni-Co-Sevac  (Co Site) |
| NiSe (001) | H2O | 4.323 | 2.169 | 4.039 | 5.247 | 2.265 | 4.120 |
| OH | 3.486 | 2.179 | 3.653 | 4.994 | 2.265 | 3.810 |
| O | 3.528 | 1.942 | 3.549 | 5.025 | 2.042 | 3.843 |
| OOH | 3.466 | 2.135 | 3.641 | 4.918 | 2.278 | 3.915 |
| O2 | 4.953 | 2.148 | 4.933 | 5.878 | 2.794 | 3.859 |
| NiSe (101) | H2O | 3.727 | 3.525 | 3.5456 | 4.797 | 3.266*  1.912  1.797  1.910  1.811 | |
| OH | 3.355 | 1.969 | 1.947 | 3.422 |
| O | 3.299 | 1.970 | 1.909 | 3.394 |
| OOH | 3.291 | 1.995 | 1.936 | 3.599 |
| O2 | 4.297 | 1.986 | 2.101 | 4.820 |

* The distinction between a Ni and a Co site is lost on the Ni-Co-Sevac (101) surface due to the adsorbed oxygen species filling the Se vacancy and bridging a surface Co and Ni atom.

**Table S6.** Interatomic distance of Se-O (Å) for OER mechanism intermediates for Ni-Se, Ni-Sevac, Ni-Co-Se, and Ni-Co-Sevac surfaces with species reacting at Ni and Co sites.

|  |  | Interatomic distance (Å) | | | | | |
| --- | --- | --- | --- | --- | --- | --- | --- |
| Structure |  | Se-O  Ni-Se | Se-O  Ni-Sevac | Se-O  Ni-Co-Se (Ni Site) | Se-O  Ni-Co-Se (Co Site) | Se-O  Ni-Co-Sevac  (Ni Site) | Se-O  Ni-Co-Sevac  (Co Site) |
| NiSe (001) | H2O | 3.463 | 3.203 | 3.554 | 3.443 | 3.338 | 3.175 |
| OH | 1.871 | 2.926 | 1.878 | 1.874 | 2.879 | 2.752 |
| O | 1.684 | 2.788 | 1.684 | 1.687 | 2.804 | 2.884 |
| OOH | 1.943 | 2.892 | 1.948 | 1.943 | 2.890 | 2.785 |
| O2 | 3.354 | 2.904 | 3.397 | 3.319 | 2.994 | 2.752 |
| NiSe (101) | H2O | 3.552 | 3.119 | 3.430 | 3.572 | 3.453*  3.031  3.048  2.869  2.767 | |
| OH | 1.926 | 2.338 | 2.753 | 1.937 |
| O | 1.702 | 1.799 | 1.804 | 1.694 |
| OOH | 2.057 | 1.876 | 2.664 | 2.056 |
| O2 | 3.231 | 1.695 | 2.856 | 3.120 |

*****The distinction between a Ni and a Co site is lost on the Ni-Co-Sevac (101) surface due to the adsorbed oxygen species filling the Se vacancy and bridging a surface Co and Ni atom.

**Table S7.** Interatomic distance of Co-O (Å) for OER mechanism intermediates for Ni-Co-Se and Ni-Co-Sevac surfaces with species reacting at Ni and Co sites.

|  |  | Interatomic distance (Å) | | | |
| --- | --- | --- | --- | --- | --- |
| Structure |  | Co-O  Ni-Co-Se (Ni Site) | Co-O  Ni-Co-Se (Co Site) | Co-O  Ni-Co-Sevac  (Ni Site) | Co-O  Ni-Co-Sevac  (Co Site) |
| NiSe (001) | H2O | 5.479 | 4.089 | 3.077 | 2.107 |
| OH | 3.432 | 3.475 | 2.082 | 2.129 |
| O | 3.493 | 3.522 | 1.878 | 1.726 |
| OOH | 3.557 | 3.485 | 2.009 | 2.093 |
| O2 | 4.849 | 4.866 | 1.889 | 2.034 |
| NiSe (101) | H2O | 4.483 | 3.964 | 3.898*  1.933  1.735  1.915  1.736 | |
| OH | 3.498 | 3.594 |
| O | 3.659 | 3.512 |
| OOH | 3.851 | 3.583 |
| O2 | 3.720 | 4.340 |

*The distinction between a Ni and a Co site is lost on the Ni-Co-Sevac (101) surface due to the adsorbed oxygen species filling the Se vacancy and bridging a surface Co and Ni atom.

**Overall performance**

Table S8. A review of OER catalyst performance table

|  |  |  |  | | |  | | | **Activity** | | | | | |  | | | **Durability** | | | | | |  | | |
| --- | --- | --- | --- | --- | --- | --- | --- | --- | --- | --- | --- | --- | --- | --- | --- | --- | --- | --- | --- | --- | --- | --- | --- | --- | --- | --- |
| **#** | **Catalyst** | **Electrolyte** | | | **Electrode(a)** | | | **Loading** | | | **η(b)** | | | **Tafel** | | |  | | | **(Electrode) Test(c)** | | | **Time** | | | **Reference** | |
|  |  | |  | | | [mg.cm-2] | | | [mV] | | | [mV.dec-1] | | |  | | |  | | | [hours] | | |  | | |
| 1 | FeP/Ni2P | 1 M KOH | NF | | | 8 | | | 154 | | | 22.7 | | |  | | | CP @500 mA.cm-2 | | | 40 | | | Nat. Comm., 2018 18 | | | |
| 2 | (Ni,Fe)OOH | 1 M KOH | NF | | | 4.0 | | | 154 | | | 41.5 | | |  | | | CP @1 A.cm-2 | | | 42 | | | Ener. Env. Sci., 2018 19 | | | |
| 3 | Core-shell NiFeCu | 1 M KOH | NF | | | 10.2 | | | 180 | | | 33 | | |  | | | CP @10 mA.cm-2 | | | 20 | | | Nat. Comm., 2018 20 | | | |
| 4 | Ni3S2 nanorods | 0.1 M KOH | NF | | | 37 | | | 187 | | | 159.3 | | |  | | | CA 10 mA.cm-2 | | | 10 | | | Ener. Env. Sci., 2013 21 | | | |
| 5 | Co(OH)2 TCNQ(d) | 1 M KOH | Cu Foam | | | - | | | 200 | | | 188 | | |  | | | CA @450 mV | | | 25 | | | Adv. Mat., 2018 22 | | | |
| 6 | NiFe nanosheets | 1 M KOH | NF | | | - | | | 215 | | | 32 | | |  | | | CP @100mA.cm-2  CP @500mA.cm-2 | | | 10 2 | | | Nat. Comm., 2015 23 | | | |
| 7 | (Ni, Co)0.85Se@NiCo‐LDH | 1 M KOH | CC | | | 6 | | | 216 | | | 77 | | |  | | | CP @10mA.cm-2  η=+11% | | | 24 | | | Adv. Mat., 2015 24 | | | |
| 8 | G-FeCoW | 1 M KOH | GC | | | 0.21 | | | 223 | | | 37 | | |  | | | (NF/Au) CP @10 mA.cm-2 | | | 500 | | | Science, 2016 25 | | | |
| 9 | Co-NiSe2 | 1 M KOH | Ti plate | | | 1.67 | | | 226 | | | 94 | | |  | | | CP @10 mA.cm-2 | | | 10 | | | Nanoscale, 2016 26 | | | |
| 10 | (Ni0.75Fe0.25)Se2 (d) | 1 M KOH | CC | | | - | | | 230 | | | 47.2 | | |  | | | CP @35 mA.cm-2 | | | 28 | | | ACS App. Mat. & Int., 2016 27 | | | |
| 11 | FeOOH/Co/FeOOH (d) | 1 M NaOH | NF | | | 0.5 | | | 237 | | | 32 | | |  | | | CP @200 mA.cm-2 | | | 50 | | | Angew. Chem.,2016 28 | | | |
| 12 | P-Co3O4(d) | 1 M KOH | NF | | | - | | | 240 | | | 60 | | |  | | | CA @300 mV | | | 25 | | | ACS Catalysis, 2018 29 | | | |
| 13 | NiSe Nanowires(d) | 1 M KOH | NF | | | 2.77 | | | 250 | | | 64 | | |  | | | CP @100 mA.cm-2 | | | 12 | | | Angew. Chem., 2015 30 | | | |
| 14 | CoAl-NS | 1 M KOH | Graphene | | | 0.05 | | | 252 | | | 36 | | |  | | | CP @70mA.cm-2 | | | 30 | | | Adv. Mat., 2016 31 | | | |
| 15 | a-CoVOx/NF | 1 M KOH | NF | | | - | | | 254 | | | 35 | | |  | | | CP @10mA.cm-2 | | | 15 | | | ACS Catalysis, 2018 32 | | | |
| 16 | (NiCo)0.85Se | 1 M KOH | CC | | | 5 | | | 255 | | | 79 | | |  | | | CP @10mA.cm-2  η=+8% | | | 24 | | | Adv. Mat., 2015 24 | | | |
| 17 | Co4N nanowire | 1 M KOH | CC | | | 0.82 | | | 257 | | | 44 | | |  | | | CA 75 mA.cm-2 | | | 12 | | | Angew. Chem., 2015 33 | | | |
| 18 | NiFe-LDH/CNT (d) | 1 M KOH | GC | | | 0.2 | | | 264 | | | 31 | | |  | | | (GC) CP @10 mA.cm-2 (NF) CP @20 mA.cm-2 | | | 1 108 | | | JACS, 2013 34 | | | |
| 19 | NiFe LDH/Fe Plate Corrosion Engineering | 1 M KOH | Fe Plate | | | - | | | 269 | | | 48.3 | | |  | | | CP @1000 mA.cm-2 | | | 5000 | | | Nat. Comm., 2018 35 | | | |
| 20 | CoO hexagrams | 1 M KOH | GC | | | 0.28 | | | 269 | | | 64.4 | | |  | | | (ITO) CP @10 mA.cm-2 | | | 10 | | | Chem. Sci., 2018 36 | | | |
| 21 | CoO-MoO2 | 1 M KOH | NF | | | - | | | 270 | | | 36.7 | | |  | | | CP @20 mA.cm-2 | | | 10 | | | Nanoscale, 2015 37 | | | |
| 22 | Fe7S8 nanosheets | 1 M KOH | GC | | | 0.143 | | | 270 | | | 43 | | |  | | | CP @10 mA.cm-2 | | | 25 | | | ACS Cent. Sci., 2017 38 | | | |
| 23 | Ni0.2Co0.8Se | 1 M KOH | CC | | | 0.2 | | | 280 | | | 86.8 | | |  | | | CA j=-17.44% | | | 10 | | | Nano-Micro Lett., 2019 39 | | | |
| 24 | S|NiNx | 1 M KOH | GF | | | 0.15 | | | 280 | | | 45 | | |  | | | CP @10 mA.cm-2 | | | 10 | | | Nature Comm., 2019 40 | | | |
| 25 | CoSe2 UNM | 1 M KOH | GC | | | 0.28 | | | 284 | | | 46.3 | | |  | | | CP @10mA.cm-2 | | | 20 | | | J. of Mat. Chem. A, 2019 41 | | | |
| 26 | Ni2P | 1 M KOH | GC | | | 0.14 | | | 290 | | | 47 | | |  | | | CP @10 mA.cm-2 | | | 10 | | | Ener. Env. Sci., 2015 42 | | | |
| 27 | A-CoS4.6O0.6 | 1 M KOH | GC | | | 0.8 | | | 290 | | | 67 | | |  | | | CP @10 mA.cm-2 | | | 1.25 | | | Angew. Chem., 2017 43 | | | |
| 28 | Co3O4C-NA | 0.1 M KOH | Cu foil | | | 0.2 | | | 290 | | | 70 | | |  | | | CP @10 mA.cm-2 | | | 30 | | | JACS, 2014 44 | | | |
| 29 | NiCo2O4 | 1 M NaOH | NF | | | 1 | | | 290 | | | 53 | | |  | | | CP @10 mA.cm-2 | | | 32 | | | Angew. Chem, 2016 45 | | | |
| 30 | a-Co4Fe(OH)x | 1 M KOH | GC | | | 0.28 | | | 295 | | | 52 | | |  | | | CA 10 mA.cm-2 | | | 3 | | | JACS, 2017 46 | | | |
| 31 | γ-CoOOH nanosheet | 1 M KOH | GC | | | 0.15 | | | 300 | | | 38 | | |  | | | - | | |  | | | Science, 2017 47 | | | |
| 32 | NiFe-nanosheet | 1 M KOH | GC | | | 0.07 | | | 300 | | | 40 | | |  | | | - | | | - | | | JACS, 2005 48 | | | |
| 33 | IrO2 | 1 M KOH | GC | | | 0.250 | | | 300 | | | 48 | | |  | | | - | | | - | | | Sus. Ener. & Fuels,2017 49 | | | |
| 34 | Ni0.75V0.25-LDH | 1 M KOH | NF | | | 0.25 | | | 300 | | | 50 | | |  | | | CP @10 mA.cm-2 | | | 25 | | | Nat. Comm., 2016 50 | | | |
| 35 | FeCo-ONS | 0.1 M KOH | GC | | | 0.36 | | | 308 | | | 36.8 | | |  | | | CA j =+11.2% | | | 2.8 | | | Adv. Mat., 2017 51 | | | |
| 36 | CoO-MoO2 | 1 M KOH | GC | | | 0.5 | | | 312 | | | 70 | | |  | | | CP @10 mA.cm-2 | | | 15 | | | Adv. Fun. Mat., 2017 52 | | | |
| 37 | CoSn(OH)6 | 1 M KOH | GC | | | 0.094 | | | 313 | | | - | | |  | | | CA @313 mV | | | 11 | | | Ener. Env. Sci., 2016 53 | | | |
| 38 | NiCo-r | 1 M KOH | GC | | | 0.285 | | | 320 | | | 30 | | |  | | | CV 1000 cycles | | | - | | | Angew. Chem., 2015 54 | | | |
| 39 | CoSe2 nanosheet | 0.1 M KOH | GC | | | 0.142 | | | 320 | | | 44 | | |  | | | CV 1000 cycles | | | - | | | JACS, 2014 55 | | | |
| 40 | Fe3O4@Co9S8/rGO-2 | 1 M KOH | GC | | | 0.25 | | | 320 | | | 54.5 | | |  | | | CA @320 mV j =-12% | | | 6 | | | Adv. Fun. Mat., 2016 56 | | | |
| 41 | Ag-CoSe2 nanobelts | 0.1 M KOH | GC | | | 0.2 | | | 320 | | | 56 | | |  | | | CV 1000 cycles | | | - | | | Angew. Chem., 2017 57 | | | |
| 42 | NiV-LDH | 1 M KOH | GC | | | 0.143 | | | 320 | | | - | | |  | | | - | | | - | | | Nat. Comm., 2016 50 | | | |
| 43 | CoMn LDH | 1 M KOH | GC | | | 0.142 | | | 324 | | | 43 | | |  | | | CA @300 mV | | | 14 | | | JACS, 2014 58 | | | |
| 44 | Co0.85Se | 1 M KOH | CC | | | 4.3 | | | 324 | | | 85 | | |  | | | - | | | - | | | Adv. Mat., 2015 24 | | | |
| 45 | Fe-CoOOH/G | 1 M KOH | GC | | | 0.2 | | | 330 | | | 37 | | |  | | | CP @10 mA.cm-2 | | | 5.5 | | | Adv. Ener. Mat., 2017 59 | | | |
| 46 | α-Ni(OH)2 | 0.1 M KOH | GC | | | 0.2 | | | 331 | | | 42 | | |  | | | CA @350 mV | | | 25 | | | JACS, 2014 60 | | | |
| 47 | nNiFe LDH/NGF | 0.1 M KOH | GC | | | 0.25 | | | 337 | | | 45 | | |  | | | CA @350mV | | | 3.3 | | | Adv. Mat. 2015 61 | | | |
| 48 | NiCo2S4 | 1 M KOH | GC | | | 0.07 | | | 337 | | | 64 | | |  | | | CP @10 mA.cm-2 | | | 30 | | | Green Chemistry, 2017 62 | | | |
| 49 | Co3O4/NiCo2O4 | 1 M KOH | NF | | | 1 | | | 340 | | | 88 | | |  | | | - | | | - | | | JACS, 2015 63 | | | |
| 50 | CoSe | 1 M KOH | CC | | | 0.2 | | | 345 | | | 89.3 | | |  | | | - | | | - | | | Nano-Micro Lett., 2019 39 | | | |
| 51 | CoFe35 LDH | 0.1 M KOH | GC | | | 0.25 | | | 350 | | | 49 | | |  | | | (NF) CP @10mA.cm-2 | | | 48 | | | ChemSusChem, 2016 64 | | | |
| 52 | CoTe2 nanofleeces | 0.1 M KOH | GC | | | 0.25 | | | 357 | | | 32 | | |  | | | CV 2000 cycles | | | - | | | Angew. Chem., 2017 65 | | | |
| 53 | PrBa0.5Sr0.5Co1.5Fe0.5O5 | 0.1 M KOH | GC | | | 0.202 | | | 358 | | | 52 | | |  | | | CP @10mA.cm-2 | | | 12 | | | Nat. Comm., 2017 66 | | | |
| 54 | a-CoVOx/GC | 1 M KOH | GC | | | 0.14 | | | 358 | | | 51 | | |  | | | - | | | - | | | ACS Catalysis, 2018 32 | | | |
| 55 | Ni0.5Co0.5Se | 1 M KOH | CC | | | 0.2 | | | 360 | | | 98 | | |  | | | - | | | - | | | Nano-Micro Lett., 2019 39 | | | |
| 56 | Co3S4 nanosheets | 0.1 M KOH | GC | | | 0.283 | | | 363 | | | 90 | | |  | | | CV 1000 cycles | | | - | | | ACS Nano, 2014 67 | | | |
| 57 | NG-CoSe2 | 0.1 M KOH | GC | | | 0.2 | | | 366 | | | 40 | | |  | | | CV 2000 cycles  η=+6% @10mA.cm-2 | | | - | | | ACS Nano, 2014 68 | | | |
| 58 | NiCo LDH | 1 M KOH | CP | | | 0.17 | | | 367 | | | 40 | | |  | | | CP @20 mA.cm-2 | | | 6 | | | Nano Lett., 2015 69 | | | |
| 59 | NiCo2O4 | 1 M KOH | GC | | | 0.07 | | | 377 | | | 91 | | |  | | | - | | |  | | | Green Chemistry, 2017 62 | | | |
| 60 | CoO/hi-Mn3O4 | 1 M KOH | GC | | | - | | | 378 | | | 61 | | |  | | | CA @370 mV | | | 2.2 | | | Angew. Chem., 2017 70 | | | |
| 61 | Ba0.5Sr0.5Co0.8Fe0.2Ox |  | RDE | | | 0.25 | | | 380 | | | 60 | | |  | | | - | | | - | | | Science, 2011 71 | | | |
| 62 | α-Co(OH)2 | 1 M KOH | GC | | | 0.28 | | | 380 | | | 67 | | |  | | | CP @5 mA.cm-2 | | | 7 | | | Dalton Trans., 2017 72 | | | |
| 63 | CoS-βCo(OH)2 @aMoS2+x | 1 M KOH | NF | | | 0.2 | | | 380 | | | 68 | | |  | | | CP @10 mA.cm-2 | | | 28 | | | Adv. Fun. Mat., 2016 73 | | | |
| 64 | NiSe | 1 M KOH | CC | | | 0.2 | | | 390 | | | 225.6 | | |  | | | - | | | - | | | Nano-Micro Lett., 2019 39 | | | |
| 65 | Co3O4 nanowire | 1 M KOH | GC | | | 0.136 | | | 400 | | | 72 | | |  | | | CA @420 mV j=-31% | | | 1.7 | | | Adv. Ener. Mat., 2014 74 | | | |
| 66 | Co9S8@MoS2/CNFs | 1 M KOH | GC | | | 0.212 | | | 430 | | | 61 | | |  | | | CV 1000 cycles | | | - | | | Adv. Mat., 2015 75 | | | |

(a) GC: glassy carbon, CP: carbon paper, NF: nickel foam, CC: Carbon Cloth, GF: Graphite Foil (b) Taken @10 mA.cm-2 (c) CP chronopotentiometry, CA: chronoampero

metry, CV: cyclic voltammetry (d) η obtained using Tafel slope

Table S9. A review on AEM water electrolyzers. *iR-corrected voltage

| **Anode** | | | |  | | **Cathode** | | | |  | |  | |  | |  | **Operating Conditions** | | | | | **Reference** | |
| --- | --- | --- | --- | --- | --- | --- | --- | --- | --- | --- | --- | --- | --- | --- | --- | --- | --- | --- | --- | --- | --- | --- | --- |
| Catalyst | GDL | Loading (mg.cm-2) |  | | Catalyst | | GDL | Loading (mg.cm-2) |  | | Membrane | |  | | Cell Voltage (V) | | | Current Density (A.cm-2) | T (oC) | Stability (h) | Electrolyte |  |
| **(NiCo)3Se4** | **NF** | **2** |  | | **Pt/C** | | **CP** | **1** |  | | **Sustainion** | |  | | **2** | | | **2** | **60** | **50 @1A.cm-2** | **1 M KOH** | **This work** |
| **IrO2** | **NF** | **2** |  | | **Pt/C** | | **CP** | **1** |  | | **Sustainion** | |  | | **2** | | | **1** | **25** | **-** | **1 M KOH** | **This work** |
| NiFe2O4 | Ni felt | 2 |  | | NiFeCo | | SS fiber paper | 2 |  | | Sustainion | |  | | 2.13 | | | 2 | 60 | - | 1 M KOH | Pushkareva et al. 76 |
| IrO2 | Ti-based | 4 |  | | Pt/C | | Carbon-based | 0.4 |  | | FAA-3-50 | |  | | 1.9 | | | 1.5 | 60 | - | 1 M KOH | J.E Park 77 |
| CuCoOx | NF | 23 |  | | Pt/C | | CC | 4 |  | | Sustainion | |  | | 1.9 | | | 1.4 | 45 | 12 @0.5 A.cm-2 | 1 M KOH | Park et al. 78 |
| Fe-NiMo-NH2/H2 | Ni Foam | 3 |  | | NiMo-NH3/H2 | | Ni Foam | 3 |  | | Sustainion | |  | | 1.57* | | | 1 | 80 | 25 @ 0.5 A.cm-2 | 1 M KOH | Chen et al. 79 |

**References**

1 S. Ghobrial, D. W. Kirk and S. J. Thorpe, Amorphous Ni-Nb-Y Alloys as Hydrogen Evolution Electrocatalysts, *Electrocatalysis*, 2019, **10**, 243–252.

2 M. S. El-eskandarany, Cyclic phase transformations of mechanically alloyed Co 75 Ti 25 powders, 2002, **50**, 1113–1123.

3 G. Fan, F. Guo, Z. Hu, M. Quan and K. Lu, Amorphization of selenium induced by high-energy ball milling, *Phys. Rev. B - Condens. Matter Mater. Phys.*, 1997, **55**, 11010–11013.

4 C. Suryanarayana, *Mechanical Alloying And Milling*, CRC Press, 2004, illustrate., 2004.

5 K. M. Cole, D. W. Kirk and S. J. Thorpe, In Situ Raman Study of Amorphous and Crystalline Ni-Co Alloys for the Alkaline Oxygen Evolution Reaction, *J. Electrochem. Soc.*, 2018, **165**, J3122–J3129.

6 B. Zhang, X. Zheng, O. Voznyy, R. Comin, M. Bajdich, F. P. G. De Arquer, C. T. Dinh, F. Fan, M. Yuan, A. Janmohamed, H. L. Xin and H. Yang, Homogeneously dispersed, multimetal oxygen-evolving catalysts, *Science*, 2016, **352**, 333–338.

7 S. Klaus, Y. Cai, M. W. Louie, L. Trotochaud and A. T. Bell, Effects of Fe electrolyte impurities on Ni(OH)2/NiOOH structure and oxygen evolution activity, *J. Phys. Chem. C*, 2015, **119**, 7243–7254.

8 A. C. Garcia and M. T. M. Koper, Effect of Saturating the Electrolyte with Oxygen on the Activity for the Oxygen Evolution Reaction, *ACS Catal.*, 2018, **8**, 9359–9363.

9 G. Li, L. Anderson, Y. Chen, M. Pan and P.-Y. Abel Chuang, New insights into evaluating catalyst activity and stability for oxygen evolution reactions in alkaline media, *Sustain. Energy Fuels*, 2018, **2**, 237–251.

10 H. Zhang, J. Zheng, Y. Chao, K. Zhang and Z. Zhu, Surface engineering of FeCo-based electrocatalysts non-noble metals for water oxidation †, 2018, 7254–7261.

11 B. Ravel and M. Newville, ATHENA, ARTEMIS, HEPHAESTUS: Data analysis for X-ray absorption spectroscopy using IFEFFIT, *J. Synchrotron Radiat.*, 2005, **12**, 537–541.

12 J. P. Perdew, K. Burke and M. Ernzerhof, Generalized gradient approximation made simple, *Phys. Rev. Lett.*, 1996, **77**, 3865–3868.

13 S. Grimme, J. Antony, S. Ehrlich and H. Krieg, A consistent and accurate ab initio parametrization of density functional dispersion correction (DFT-D) for the 94 elements H-Pu, *J. Chem. Phys.*, , DOI:10.1063/1.3382344.

14 S. Grimme, Semiempirical GGA-type density functional constructed with a long-range dispersion correction, *J. Comput. Chem.*, 2006, **27**, 1787–1799.

15 N. Troullier and J. L. Martins, Efficient pseudopotentials for plane-wave calculations, *Phys. Rev. B*, 1991, **43**, 1993–2006.

16 P. Giannozzi, S. Baroni, N. Bonini, M. Calandra, R. Car, C. Cavazzoni, D. Ceresoli, G. L. Chiarotti, M. Cococcioni, I. Dabo, A. Dal Corso, S. De Gironcoli, S. Fabris, G. Fratesi, R. Gebauer, U. Gerstmann, C. Gougoussis, A. Kokalj, M. Lazzeri, L. Martin-Samos, N. Marzari, F. Mauri, R. Mazzarello, S. Paolini, A. Pasquarello, L. Paulatto, C. Sbraccia, S. Scandolo, G. Sclauzero, A. P. Seitsonen, A. Smogunov, P. Umari and R. M. Wentzcovitch, QUANTUM ESPRESSO: A modular and open-source software project for quantum simulations of materials, *J. Phys. Condens. Matter*, , DOI:10.1088/0953-8984/21/39/395502.

17 C. M. Gabardo, C. P. O’Brien, J. P. Edwards, C. McCallum, Y. Xu, C. T. Dinh, J. Li, E. H. Sargent and D. Sinton, Continuous Carbon Dioxide Electroreduction to Concentrated Multi-carbon Products Using a Membrane Electrode Assembly, *Joule*, 2019, **3**, 2777–2791.

18 F. Yu, H. Zhou, Y. Huang, J. Sun, F. Qin, J. Bao, W. A. Goddard, S. Chen and Z. Ren, High-performance bifunctional porous non-noble metal phosphide catalyst for overall water splitting, *Nat. Commun.*, 2018, **9**, 1–9.

19 H. Zhou, F. Yu, Q. Zhu, J. Sun, F. Qin, L. Yu, J. Bao, Y. Yu, S. Chen and Z. Ren, Water splitting by electrolysis at high current densities under 1.6 volts, *Energy Environ. Sci.*, 2018, **11**, 2858–2864.

20 P. Zhang, L. Li, D. Nordlund, H. Chen, L. Fan, B. Zhang, X. Sheng, Q. Daniel and L. Sun, Dendritic core-shell nickel-iron-copper metal/metal oxide electrode for efficient electrocatalytic water oxidation, *Nat. Commun.*, 2018, **9**, 1–10.

21 W. Zhou, X. J. Wu, X. Cao, X. Huang, C. Tan, J. Tian, H. Liu, J. Wang and H. Zhang, Ni3S2 nanorods/Ni foam composite electrode with low overpotential for electrocatalytic oxygen evolution, *Energy Environ. Sci.*, 2013, **6**, 2921–2924.

22 D. Wu, Y. Wei, X. Ren, X. Ji, Y. Liu, X. Guo, Z. Liu, A. M. Asiri, Q. Wei and X. Sun, Co(OH)2 Nanoparticle-Encapsulating Conductive Nanowires Array: Room-Temperature Electrochemical Preparation for High-Performance Water Oxidation Electrocatalysis, *Adv. Mater.*, 2018, **30**, 1–7.

23 X. Lu and C. Zhao, Electrodeposition of hierarchically structured three-dimensional nickel–iron electrodes for efficient oxygen evolution at high current densities, *Nat. Communiations*, 2015, **122**, 128–136.

24 C. Xia, Q. Jiang, C. Zhao, M. N. Hedhili and H. N. Alshareef, Selenide-Based Electrocatalysts and Scaffolds for Water Oxidation Applications, *Adv. Mater.*, 2016, **28**, 77–85.

25 B. Zhang, B. Zhang, X. Zheng, O. Voznyy, R. Comin, M. Bajdich, M. García-melchor, L. Han, J. Xu, M. Liu, L. Zheng, F. P. G. De Arquer, C. T. Dinh, F. Fan, M. Yuan, E. Yassitepe, N. Chen, T. Regier, P. Liu, Y. Li, P. De Luna, H. L. Xin, H. Yang, A. Vojvodic and E. H. Sargent, Homogeneously dispersed , multimetal oxygen-evolving catalysts, *Science (80-. ).*, 2016, **352**, 333.

26 T. Liu, A. M. Asiri and X. Sun, Electrodeposited Co-doped NiSe2 nanoparticles film: A good electrocatalyst for efficient water splitting, *Nanoscale*, 2016, **8**, 3911–3915.

27 Z. Wang, J. Li, X. Tian, X. Wang, Y. Yu, K. A. Owusu, L. He and L. Mai, Porous Nickel-Iron Selenide Nanosheets as Highly Efficient Electrocatalysts for Oxygen Evolution Reaction, *ACS Appl. Mater. Interfaces*, 2016, **8**, 19386–19392.

28 J. X. Feng, H. Xu, Y. T. Dong, S. H. Ye, Y. X. Tong and G. R. Li, FeOOH/Co/FeOOH Hybrid Nanotube Arrays as High-Performance Electrocatalysts for the Oxygen Evolution Reaction, *Angew. Chemie - Int. Ed.*, 2016, **55**, 3694–3698.

29 Z. Wang, H. Liu, R. Ge, X. Ren, J. Ren, D. Yang, L. Zhang and X. Sun, Phosphorus-Doped Co3O4 Nanowire Array: A Highly Efficient Bifunctional Electrocatalyst for Overall Water Splitting, *ACS Catal.*, 2018, **8**, 2236–2241.

30 C. Tang, N. Cheng, Z. Pu, W. Xing and X. Sun, NiSe Nanowire Film Supported on Nickel Foam: An Efficient and Stable 3D Bifunctional Electrode for Full Water Splitting, *Angew. Chemie - Int. Ed.*, 2015, **54**, 9351–9355.

31 J. Ping, Y. Wang, Q. Lu, B. Chen, J. Chen, Y. Huang, Q. Ma, C. Tan, J. Yang, X. Cao, Z. Wang, J. Wu, Y. Ying and H. Zhang, Self-Assembly of Single-Layer CoAl-Layered Double Hydroxide Nanosheets on 3D Graphene Network Used as Highly Efficient Electrocatalyst for Oxygen Evolution Reaction, *Adv. Mater.*, 2016, **28**, 7640–7645.

32 L. Liardet and X. Hu, Amorphous Cobalt Vanadium Oxide as a Highly Active Electrocatalyst for Oxygen Evolution, *ACS Catal.*, 2018, **8**, 644–650.

33 P. Chen, K. Xu, Z. Fang, Y. Tong, J. Wu, X. Lu, X. Peng, H. Ding, C. Wu and Y. Xie, Metallic Co4N porous nanowire arrays activated by surface oxidation as electrocatalysts for the oxygen evolution reaction, *Angew. Chemie - Int. Ed.*, 2015, **54**, 14710–14714.

34 M. Gong, Y. Li, H. Wang, Y. Liang, J. Z. Wu, J. Zhou, J. Wang, T. Regier, F. Wei and H. Dai, An advanced Ni-Fe layered double hydroxide electrocatalyst for water oxidation, *J. Am. Chem. Soc.*, 2013, **135**, 8452–8455.

35 Y. Liu, X. Liang, L. Gu, Y. Zhang, G. D. Li, X. Zou and J. S. Chen, Corrosion engineering towards efficient oxygen evolution electrodes with stable catalytic activity for over 6000 hours, *Nat. Commun.*, 2018, **9**, 1–10.

36 Z. Liang, Z. Huang, H. Yuan, Z. Yang, C. Zhang, Y. Xu, W. Zhang, H. Zheng and R. Cao, Quasi-single-crystalline CoO hexagrams with abundant defects for highly efficient electrocatalytic water oxidation, *Chem. Sci.*, 2018, **9**, 6961–6968.

37 B. B. Li, Y. Q. Liang, X. J. Yang, Z. D. Cui, S. Z. Qiao, S. L. Zhu, Z. Y. Li and K. Yin, MoO2-CoO coupled with a macroporous carbon hybrid electrocatalyst for highly efficient oxygen evolution, *Nanoscale*, 2015, **7**, 16704–16714.

38 S. Chen, Z. Kang, X. Zhang, J. Xie, H. Wang, W. Shao, X. Zheng, W. Yan, B. Pan and Y. Xie, Highly Active Fe Sites in Ultrathin Pyrrhotite Fe 7 S 8 Nanosheets Realizing Efficient Electrocatalytic Oxygen Evolution, *ACS Cent. Sci.*, 2017, **3**, 1221–1227.

39 Z. Qian, Y. Chen, Z. Tang, Z. Liu, X. Wang, Y. Tian and W. Gao, Hollow Nanocages of NixCo1−xSe for Efficient Zinc–Air Batteries and Overall Water Splitting, *Nano-Micro Lett.*, , DOI:10.1007/s40820-019-0258-0.

40 Y. Hou, M. Qiu, M. G. Kim, P. Liu, G. Nam, T. Zhang, X. Zhuang, B. Yang, J. Cho, M. Chen, C. Yuan, L. Lei and X. Feng, Atomically dispersed nickel–nitrogen–sulfur species anchored on porous carbon nanosheets for efficient water oxidation, *Nat. Commun.*, 2019, **10**, 1–9.

41 Y. Zhang, C. Zhang, Y. Guo, D. Liu, Y. Yu and B. Zhang, Selenium vacancy-rich CoSe2 ultrathin nanomeshes with abundant active sites for electrocatalytic oxygen evolution, 2019, 2536–2540.

42 L. A. Stern, L. Feng, F. Song and X. Hu, Ni2P as a Janus catalyst for water splitting: The oxygen evolution activity of Ni2P nanoparticles, *Energy Environ. Sci.*, 2015, **8**, 2347–2351.

43 P. Cai, J. Huang, J. Chen and Z. Wen, Oxygen-Containing Amorphous Cobalt Sulfide Porous Nanocubes as High-Activity Electrocatalysts for the Oxygen Evolution Reaction in an Alkaline/Neutral Medium, *Angew. Chemie - Int. Ed.*, 2017, **56**, 4858–4861.

44 T. Y. Ma, S. Dai, M. Jaroniec and S. Z. Qiao, Metal-organic framework derived hybrid Co3O4-carbon porous nanowire arrays as reversible oxygen evolution electrodes, *J. Am. Chem. Soc.*, 2014, **136**, 13925–13931.

45 X. Gao, H. Zhang, Q. Li, X. Yu, Z. Hong, X. Zhang, C. Liang and Z. Lin, Hierarchical NiCo 2 O 4 hollow microcuboids as bifunctional electrocatalysts for overall water-splitting, *Angew. Chemie - Int. Ed.*, 2016, **55**, 6290–6294.

46 H. Jin, S. Mao, G. Zhan, F. Xu, X. Bao and Y. Wang, Fe incorporated α-Co(OH)2 nanosheets with remarkably improved activity towards the oxygen evolution reaction, *J. Mater. Chem. A*, 2017, **5**, 1078–1084.

47 Z. W. Seh, J. Kibsgaard, C. F. Dickens, I. Chorkendorff, J. K. Nørskov and T. F. Jaramillo, Combining theory and experiment in electrocatalysis: Insights into materials design, *Science (80-. ).*, 2017, **355**, 4998.

48 Z. Liu, R. Ma, M. Osada, K. Takada and T. Sasaki, Selective and controlled synthesis of α- and β-cobalt hydroxides in highly developed hexagonal platelets, *J. Am. Chem. Soc.*, 2005, **127**, 13869–13874.

49 G. Li, L. Anderson and Y. Chen, New insights into evaluating catalyst activity and stability for oxygen evolution reactions in alkaline media †, *Sustain. Energy Fuels*, 2017, **2**, 237–251.

50 K. Fan, H. Chen, Y. Ji, H. Huang, P. M. Claesson, Q. Daniel, B. Philippe, H. Rensmo, F. Li, Y. Luo and L. Sun, Nickel-vanadium monolayer double hydroxide for efficient electrochemical water oxidation, *Nat. Commun.*, 2016, **7**, 1–9.

51 L. Zhuang, L. Ge, Y. Yang, M. Li, Y. Jia, X. Yao and Z. Zhu, Ultrathin Iron-Cobalt Oxide Nanosheets with Abundant Oxygen Vacancies for the Oxygen Evolution Reaction, *Adv. Mater.*, , DOI:10.1002/adma.201606793.

52 F. Lyu, Y. Bai, Z. Li, W. Xu, Q. Wang, J. Mao, L. Wang, X. Zhang and Y. Yin, Self-Templated Fabrication of CoO–MoO 2 Nanocages for Enhanced Oxygen Evolution, *Adv. Funct. Mater.*, 2017, **27**, 2–9.

53 F. Song, K. Schenk and X. Hu, A nanoporous oxygen evolution catalyst synthesized by selective electrochemical etching of perovskite hydroxide CoSn(OH)6 nanocubes, *Energy Environ. Sci.*, 2016, **9**, 473–477.

54 J. Bao, X. Zhang, B. Fan, J. Zhang, M. Zhou, W. Yang, X. Hu, H. Wang, B. Pan and Y. Xie, Ultrathin Spinel-Structured Nanosheets Rich in Oxygen Deficiencies for Enhanced Electrocatalytic Water Oxidation, *Angew. Chemie - Int. Ed.*, 2015, **54**, 7399–7404.

55 Y. Liu, H. Cheng, M. Lyu, S. Fan, Q. Liu, W. Zhang, Y. Zhi, C. Wang, C. Xiao, S. Wei, B. Ye and Y. Xie, Low overpotential in vacancy-rich ultrathin CoSe2 nanosheets for water oxidation, *J. Am. Chem. Soc.*, 2014, **136**, 15670–15675.

56 J. Yang, G. Zhu, Y. Liu, J. Xia, Z. Ji, X. Shen and S. Wu, Fe3O4-Decorated Co9S8 Nanoparticles In Situ Grown on Reduced Graphene Oxide: A New and Efficient Electrocatalyst for Oxygen Evolution Reaction, *Adv. Funct. Mater.*, 2016, **26**, 4712–4721.

57 X. Zhao, H. Zhang, Y. Yan, J. Cao, X. Li, S. Zhou, Z. Peng and J. Zeng, Engineering the Electrical Conductivity of Lamellar Silver-Doped Cobalt(II) Selenide Nanobelts for Enhanced Oxygen Evolution, *Angew. Chemie - Int. Ed.*, 2017, **56**, 328–332.

58 F. Song and X. Hu, Ultrathin cobalt-manganese layered double hydroxide is an efficient oxygen evolution catalyst, *J. Am. Chem. Soc.*, 2014, **136**, 16481–16484.

59 X. Han, C. Yu, S. Zhou, C. Zhao, H. Huang, J. Yang, Z. Liu, J. Zhao and J. Qiu, Ultrasensitive Iron-Triggered Nanosized Fe–CoOOH Integrated with Graphene for Highly Efficient Oxygen Evolution, *Adv. Energy Mater.*, , DOI:10.1002/aenm.201602148.

60 M. Gao, W. Sheng, Z. Zhuang, Q. Fang, S. Gu, J. Jiang and Y. Yan, Efficient water oxidation using nanostructured α-nickel-hydroxide as an electrocatalyst, *J. Am. Chem. Soc.*, 2014, **136**, 7077–7084.

61 C. Tang, H. Sen Wang, H. F. Wang, Q. Zhang, G. L. Tian, J. Q. Nie and F. Wei, Spatially Confined Hybridization of Nanometer-Sized NiFe Hydroxides into Nitrogen-Doped Graphene Frameworks Leading to Superior Oxygen Evolution Reactivity, *Adv. Mater.*, 2015, **27**, 4516–4522.

62 J. Jiang, C. Yan, X. Zhao, H. Luo, Z. Xue and T. Mu, A PEGylated deep eutectic solvent for controllable solvothermal synthesis of porous NiCo2S4 for efficient oxygen evolution reaction, *Green Chem.*, 2017, **19**, 3023–3031.

63 H. Hu, B. Guan, B. Xia and X. W. Lou, Designed formation of Co3O4/NiCo2O4 double-shelled nanocages with enhanced pseudocapacitive and electrocatalytic properties, *J. Am. Chem. Soc.*, 2015, **137**, 5590–5595.

64 F. Yang, K. Sliozberg, I. Sinev, H. Antoni, A. Bähr, K. Ollegott, W. Xia, J. Masa, W. Grünert, B. R. Cuenya, W. Schuhmann and M. Muhler, Synergistic Effect of Cobalt and Iron in Layered Double Hydroxide Catalysts for the Oxygen Evolution Reaction, *ChemSusChem*, 2017, **10**, 156–165.

65 Q. Gao, C. Q. Huang, Y. M. Ju, M. R. Gao, J. W. Liu, D. An, C. H. Cui, Y. R. Zheng, W. X. Li and S. H. Yu, Phase-Selective Syntheses of Cobalt Telluride Nanofleeces for Efficient Oxygen Evolution Catalysts, *Angew. Chemie - Int. Ed.*, 2017, **56**, 7769–7773.

66 B. Zhao, L. Zhang, D. Zhen, S. Yoo, Y. Ding, D. Chen, Y. Chen, Q. Zhang, B. Doyle, X. Xiong and M. Liu, A tailored double perovskite nanofiber catalyst enables ultrafast oxygen evolution, *Nat. Commun.*, 2017, **8**, 1–9.

67 W. Zhao, C. Zhang, F. Geng, S. Zhuo and B. Zhang, Nanoporous hollow transition metal chalcogenide nanosheets synthesized via the anion-exchange reaction of metal hydroxides with chalcogenide ions, *ACS Nano*, 2014, **8**, 10909–10919.

68 M. R. Gao, X. Cao, Q. Gao, Y. F. Xu, Y. R. Zheng, J. Jiang and S. H. Yu, Nitrogen-doped graphene supported CoSe2 nanobelt composite catalyst for efficient water oxidation, *ACS Nano*, 2014, **8**, 3970–3978.

69 H. Liang, F. Meng, M. Cabán-Acevedo, L. Li, A. Forticaux, L. Xiu, Z. Wang and S. Jin, Hydrothermal continuous flow synthesis and exfoliation of NiCo layered double hydroxide nanosheets for enhanced oxygen evolution catalysis, *Nano Lett.*, 2015, **15**, 1421–1427.

70 C. Guo, Y. Zheng, J. Ran, F. Xie, M. Jaroniec and S. Z. Qiao, Engineering High-Energy Interfacial Structures for High-Performance Oxygen-Involving Electrocatalysis, *Angew. Chemie - Int. Ed.*, 2017, **56**, 8539–8543.

71 J. Suntivich, K. J. May, H. a Gasteiger, J. B. Goodenough and Y. Shao-horn, A Perovskite Oxide Optimized for Molecular Orbital Principles, *Science (80-. ).*, 2011, **334**, 2010–2012.

72 F. Lyu, Y. Bai, Q. Wang, L. Wang, X. Zhang and Y. Yin, Phase-controllable synthesis of cobalt hydroxide for electrocatalytic oxygen evolution, *Dalt. Trans.*, 2017, **46**, 10545–10548.

73 T. Yoon and K. S. Kim, One-Step Synthesis of CoS-Doped β-Co(OH)2@Amorphous MoS2+x Hybrid Catalyst Grown on Nickel Foam for High-Performance Electrochemical Overall Water Splitting, *Adv. Funct. Mater.*, 2016, **26**, 7386–7393.

74 Y. Wang, T. Zhou, K. Jiang, P. Da, Z. Peng, J. Tang, B. Kong, W. Bin Cai, Z. Yang and G. Zheng, Reduced mesoporous Co 3 O 4 nanowires as efficient water oxidation electrocatalysts and supercapacitor electrodes, *Adv. Energy Mater.*, 2014, **4**, 1–7.

75 H. Zhu, J. Zhang, R. Yanzhang, M. Du, Q. Wang, G. Gao, J. Wu, G. Wu, M. Zhang, B. Liu, J. Yao and X. Zhang, When Cubic Cobalt Sulfide Meets Layered Molybdenum Disulfide: A Core-Shell System Toward Synergetic Electrocatalytic Water Splitting, *Adv. Mater.*, 2015, **27**, 4752–4759.

76 I. V. Pushkareva, A. S. Pushkarev, S. A. Grigoriev, P. Modisha and D. G. Bessarabov, Comparative study of anion exchange membranes for low-cost water electrolysis, *Int. J. Hydrogen Energy*, , DOI:10.1016/j.ijhydene.2019.11.011.

77 J. E. Park, S. Y. Kang, S.-H. Oh, J. K. Kim, M. S. Lim, C.-Y. Ahn, Y.-H. Cho and Y.-E. Sung, High-performance anion-exchange membrane water electrolysis, *Electrochim. Acta*, 2019, **295**, 99–106.

78 Y. S. Park, M. J. Jang, J. Jeong, S. M. Park, X. Wang, M. H. Seo, S. M. Choi and J. Yang, Hierarchical Chestnut-Burr Like Structure of Copper Cobalt Oxide Electrocatalyst Directly Grown on Ni Foam for Anion Exchange Membrane Water Electrolysis, *ACS Sustain. Chem. Eng.*, , DOI:10.1021/acssuschemeng.9b06767.

79 P. Chen and X. Hu, High‐Efficiency Anion Exchange Membrane Water Electrolysis Employing Non‐Noble Metal Catalysts, *Adv. Energy Mater.*, 2020, **2002285**, 2002285.
